# Supplementary material
Source: PubMed Central journal article supplement (PMC4407816)
Supplement: NIHMS626669-supplement-Supp_Material.pdf [file NIHMS626669-supplement-Supp_Material.pdf]

Supp. Figure S1

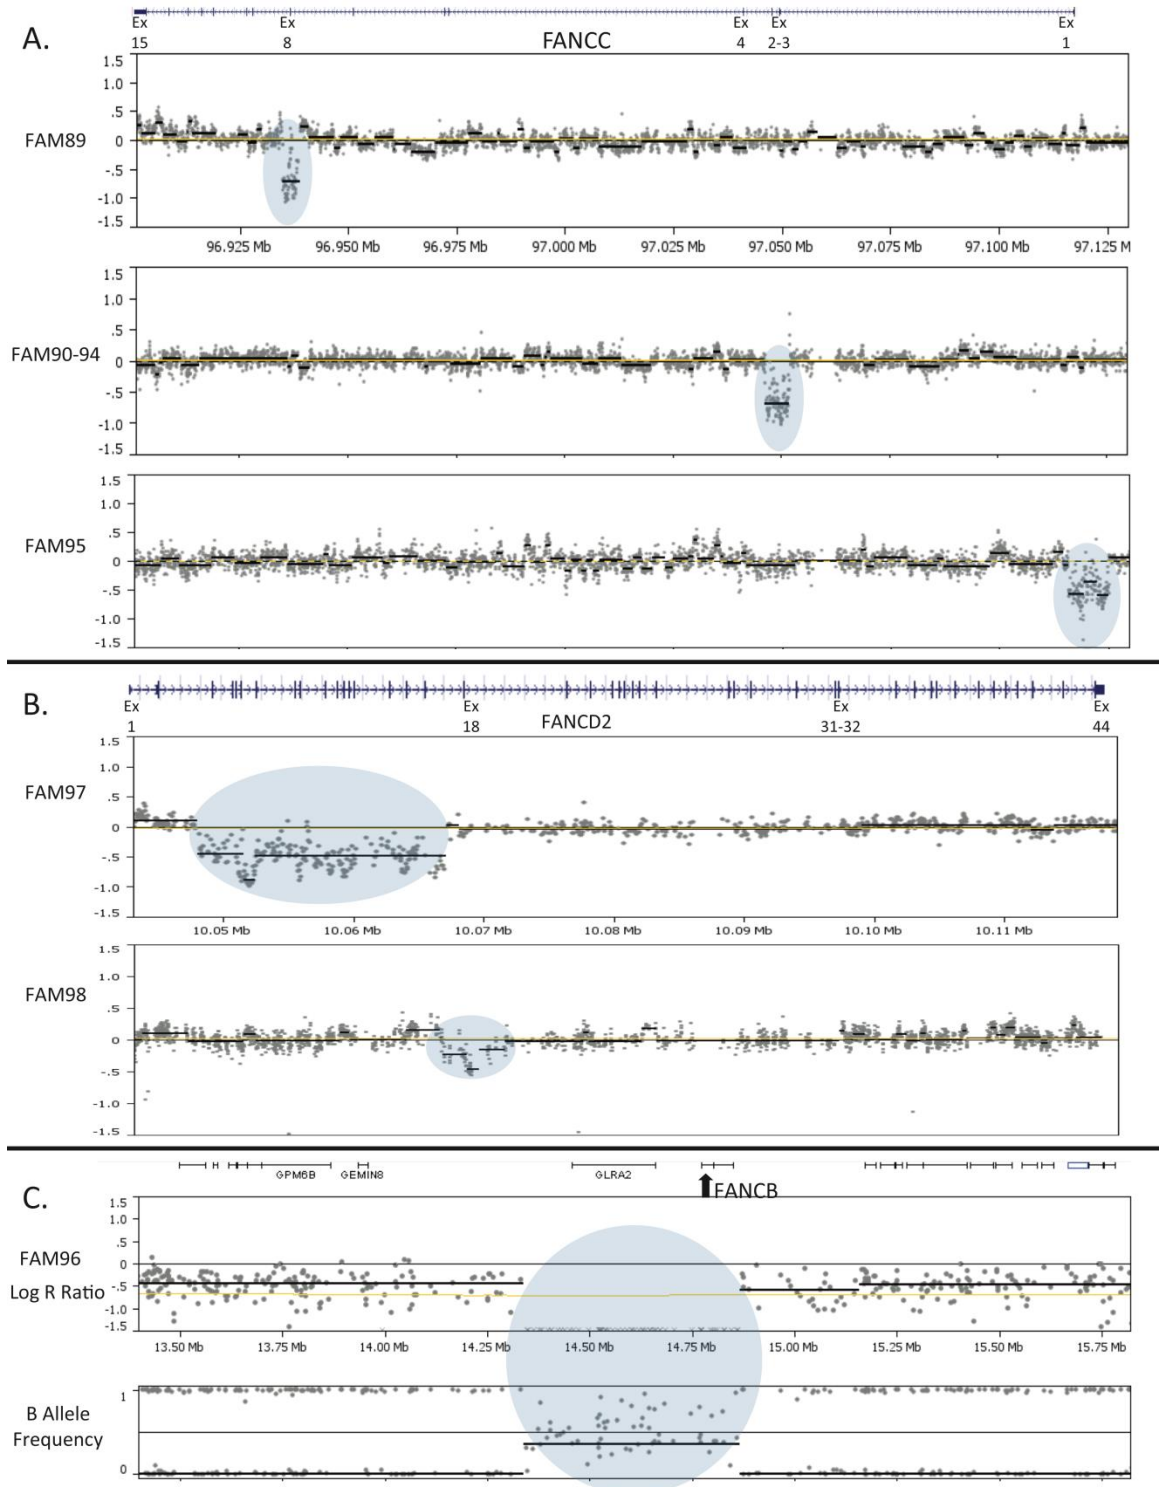

**Supp. Figure S1.** Deletions in *FANCC*, *FANCD2* and *FANCB* from aCGH and SNP array analysis. **A.** aCGH-*FANCC*. Log<sub>2</sub> Ratio plots of comparative genomic hybridization intensities from probes in the *FANCC* region of chromosome 9. **B.** aCGH-*FANCD2*. Log<sub>2</sub> Ratio plots of comparative genomic hybridization intensities from probes in the *FANCD2* region of chromosome 3. **C.** SNParray-*FANCB*. The top plot, Log R Ratio, shows the intensity values for SNPs in the *FANCB* region of chromosome X. There is a depressed signal ( $\sim -0.5$ ) for all the SNPs on chromosome X because only one copy is present (compared to the reference genome). The lack of any signal from SNPs located in the deleted region is a result of no copies being present. The bottom plot is the B Allele Frequency of SNPs in the *FANCB* region of chromosome X. The group of SNPs scattered in the middle represent probes that could not bind to the deleted region. The surrounding SNPs are all homozygous, showing a B Allele Frequency of either 1 or 0, because there is only one X chromosome present. All data in **A**, **B**, **C** is displayed using Nexus 6.1 software (Biodiscovery), and the deleted regions are shaded blue.

Supp. Figure S2

**A.**

FAM2

Cen.ref **CATGCTGAAACCTCA**TCTCTACAAAAGTACAA**T**AATTAGCCGGGCATGGTGG**CA**TGTGCCTGTAATCCAGCTACT**CT**GGAG**G**CTGAGGCAGGAG  
 BP **CATGCTGAAACCTCA**TCTCTACAAAAGTACAA**T**AATTAGCCGGGCATGGTGG**CA**TCACGCCTGTAATCCAGCTACT**CA**GGAG**A**CTGAGGCAGGAG  
 Tel.ref **GTGGAGAAACCTG**TCTCTACTAAAA**TACAA**-AATTAGCC**AGGCATGGTGG**TCACGCCTGTAATCCAGCTACT**CA**GGAG**A**CTGAGGCAGGAG

FAM4

Cen.ref **GGATCC**CAGCTT**CTTACTA**TGCCTCC**CGTAGCC**CAG**A**----CAG**CAAC**GC**CC**--CAG**T**CATT**GAG**T**TC**CGG**C**CTT**CAT**CCT**AC**-CC**ACC**  
 BP **GGATCC**CAGCTT**CTTACTA**TGCCTCC**CGTAGCC**CAG**A**----**CAG**GCT**GAG**T**CAAT**GGCG**GAT**CT**CACT**ACGG**GAC**CT**CC**AC**CTCC**  
 Tel.ref **TTTTCCTTTT**TT**TC**TT**TT**TGAGAG**GGAG**CT**CACT**GT**CGTC****CAG**GCT**GAG**T**CAAT**GGCG**GAT**CT**CACT**ACGG**GAC**CT**CC**AC**CTCC**

FAM7

Cen.ref **TAACTAAA**GAATTTTT**TTT**TG**AGACGG**AGTCTCGCTCTGT**CGCC**AGGCTGGAGT**GA**AGTGGCG**CA**TCTCGGCTCACTG**CAAGC**  
 BP **TAACTAAA**GAATTTTT**TTT**TG**AGACGG**AGTCTCGCTCTGT**CGCC**AGGCTGGAGT**GC**AGTGGCG**CGT**TCTCGGCTCACTG**CAAGC**  
 Tel.ref **TTTCT**TTTTTT**TT**TTTT**TT**AT**GA**GAC**AGTCTCGCTCTGT**CGCC**AGGCTGGAGTGC**AGTGGCG**CGT**TCTCGGCTCACTG**CAAGC**

FAM8

Cen.ref **ATCGCTTG**CCTCGGCC**CTCTG**AAAT**GCTAGG**ATTACAGCG**CTGAGCC**ACCA**TACCC**GG**CG**GA**TT**CCA**TTTCT**GTAA**CA**TT**CT**CTGA**ATG**ACAAA**-ATT**ATA  
 BP **ATCGCTTG**CCTCGGCC**CTCTG**AAAT**GCTAGG**ATTACAGCG**CTGAGCC**ACCA**CG**CCCG**CG**-----**TTTT**TTTT**TTTT**TTTT**TTTT**TT**TG**TGAG**ACAGTCTC**  
 Tel.ref **ATCTAC**CCAG**TT**CGGCC**CTCC**CA**AA**GG**GCTAGG**ATTACAGCG**CTGAGCC**ACCA**CG**CCCG**CG**TT**TTTT**TTTT**TTTT**TTTT**TTTT**TT**TG**TGAG**ACAGTCTC**

FAM10

Cen.ref **CACCTGG**AGG**TAC**GT**GTCTCT**GG**TCGC**AT**TGG**CC**CT**--AG**G**GAG**-**AT**GTGTCT**TTGG**CTAG**AG**TGT**-**TG**AC**AG**AG**CG**AG**GACTG**AG**TGTC**AC  
 BP **CACCTGG**AGG**TAC**GT**GTCTCT**GG**TCGC**AT**TGG**CC**CT**--**AG**T**GAG**AC**CTGTGTCT**ATT**ACTCA**AC**ATAC**AT**ACTAC**AG**CCATAC**CC**ATGTG**AAA  
 Tel.ref **TAGTGG**AG**GCTG**AG**GTGG**GA**AGAT**CA**CTTCAG**CT**GGGG**GA**TAC**AG**TGAG**AC**CTGTGTCT**ATT**ACTCA**AC**ATAC**AT**ACTAC**AG**CCATAC**CC**ATGTG**AAA

FAM11

Cen.ref **GCCCC**AG**AGGG**TT**TCAGGG**----**GC**AG**TTA**AG**CCCG****TC**AG**CAG**CC**CTG**AG**CC**AC**CCCT**TA**TAC**CC**CC**CC**CA**CC**CA**CC**CA**CC**CTG**AT  
 BP **GCCCC**AG**AGGG**TT**TCAGGG**----**GC**AG**TTA**AG**CCCG****TC**AG**-----**AC**CA**TC**CTG**TT**TATTG**AC**CA**TGG**AGAG**TAT**TC**CT**GT**  
 Tel.ref **TAAAGT**GT**AGGA**TT**ACAGG**CAT**GAC**CC**ACC**AG**CC**AG**CC**AG**-----**AC**CA**TC**CTG**TT**TATTG**AC**CA**TGG**AGAG**TAT**TC**CT**GT**

FAM13

Cen.ref **TCC**AC**CTCC**CG**CTTCA**AG**TG**ATT**CTCC****GC**CT**CAG**CC**TCC**CG**AGT**AG**TGG**AT**TAC**AG**GC**CC**CG**CC**ACC**AC**CC**CA**GC**TAA**GT**TT  
 BP **TCC**AC**CTCC**CG**CTTCA**AG**TG**ATT**CTCC****GC**CT**CAG**CC**TCC**CG**AGT**AG**TGG**AT**TAC**AG**GC**CC**CG**CC**ACC**AC**CC**CT**GT**CT**AA**T**GT**  
 Tel.ref **TCC**AC**CTCC**CG**CTTCA**AG**TG**ATT**CTCC****GC**CT**CAG**CC**TCC**CG**AGT**AG**TGG**AT**TAC**AG**GC**CC**CG**CC**ACC**AC**CC**CT**GT**CT**AA**T**GT**

FAM14

Cen.ref **CTT**GAG**ACA**CC**CC**CG**GG**GG**CT**TAG**AA**GT**TTCT**TGG**AGTGA**AG**CTGT**GAAGG**AGCC**AG**TGGT**CG**CTGG**AG**AG**AG**TTGA**TCTGC**TT**  
 BP **CTT**GAG**ACA**CC**CC**CG**GG**GG**CT**TAG**AA**GT**TTCT**TGG**AGTGA**AG**CC**CG**CCA**AT**TTCT**T**AAA**AG**ATGA**GG**GT**AG**GT**CG**CTGG**AG**CA**GT**GGC**  
 Tel.ref **CTT**GAG**CT**CC**AAA**AG**TCT**GG**TTAC**AG**GTGT**GA**CC**ACC**AGCC**CG**CC**CG**CCA**AT**TTCT**T**AAA**AG**ATGA**GG**GT**AG**GT**CG**CTGG**AG**CA**GT**GGC**

FAM15

Cen.ref **GGG**AG**GC**-----**GG**AG**GTGG**AG**TTG**CAG**TG**AG**CC**GAG**ATCAC**CC**ACTG**CA**TCC**AG**CC**TGG**CA**AC**AG**T**G**--**AG**AC**CTGTCT**CA**-----**AAAA**AAAA**CT**GT**TT  
 BP **GGG**AG**GC**-----**GG**AG**GTGG**AG**TTG**CAG**TG**AG**CC**GAG**ATCAC**CC**ACTG**CA**TCC**AG**CC**TGG**TC**AC**AG**CA**AG**ACT**CTGTCT**CA**-----**AAAA**AAAA**AAAA**AAAA**  
 Tel.ref **GAATGG**CT**GTA**ACC**CGGG**AG**GTGG**AG**TTG**CAG**TG**AG**CC**GAG**ATCAC**CC**ACTG**CA**TCC**AG**CC**TGG**TC**AC**AG**CA**AG**ACT**CTGTCT**CA**-----**AAAA**AAAA**AAAA**AAAA**

FAM17

Cen.ref **TAGG**CC**AGG**CA**CG**GTGG**CTCACA**CA**TG**TAA**TCC**AG**CACT**TTGG**GAG**AG**CCG**AG**GCA**GAT**CAC**AG**GT**AG**GA**AT**TC**AG**ACC**AG**CTGG**CC**A**  
 BP **TAGG**CC**AGG**CA**CG**GTGG**CTCACA**CA**TG**TAA**TCC**AG**CACT**TTGG**GAG**AG**CCG**AG**GCTGG**CG**GAT**CAC**AG**GT**TAG**GAG**TC**GAG**ACC**AT**CCTGG**GT**A**  
 Tel.ref **TGG**CC**AGG**TC**AG**GTGG**CTATGC****TG**TAA**TCC**AG**CACT**TTGG**GAG**AG**CCG**AG**GCTAG**GC**GAT**CAC**AG**GT**TAG**GAG**TC**GAG**ACC**AT**CCTGG**GT**A**

\*SNP C>G rs7204328

FAM18

Cen.ref **GTAATCC**AG**CTACT**TGG**AGG**CT**GAGG**CACA**AG**AAT**CG**CT**TGA**---**GC**CT**GG**GAG**GC**AG**GT**TG**CA**GT**GAG**TG**AG**AT**CAC**GC**CA**CC**CA**CT**G**AG**CTGG**  
 BP **GTAATCC**AG**CTACT**TGG**AGG**CT**GAGG**CACA**AG**AAT**CG**CT**TGA**---**GC**CT**GG**ATT**AC**--**AG**GT**-----**GT**GAG**CC**-----**AC**CAC**GC**CC**-**AG**C**-**CC**GA**AG**TTGT**  
 Tel.ref **CTAA**CT**CTG**AC**CTGAG**GT**AT**CT**-**ACC**CAC**CT**CA**GC**CT**CC**GA**AG**GTGG**ATT**AC**--**AG**GT**-----**GT**GAG**CC**-----**AC**CAC**GC**CC**-**AG**C**-**CC**GA**AG**TTGT**

FAM19

Cen.ref **AGG**TCT**GTG**GG**TT**CC**AGTGC**AG**G**CG**AG**CG**GG**GC**AT**CC**CTCA**AG**T**-**A**CC**ACA**T**GAC**-**C**AAA**CAC**-**A**AG**GC**T**GAG**CT**AG**CT**GGA**CT**TGC**  
 BP **AGG**TCT**GTG**GG**TT**CC**AGTGC**AG**G**CG**AG**CG**GG**GC**AT**CC**CTCA**AG**AG**GG**GTCT**CA**CTCT**GC**CACT**AAG**GC**T**-**AG**AG**T**G**-**GC**CA**AT**CT**CGT**  
 Tel.ref **AGG**C**-**GT**G**CG**CCA**CG**CG**CT**GC**CT**TTTT**TT**TT**T**G**AG**AC**AG**GG**T**CTACT**CT**GC**CA**CT**AAG**GC**T**-**AG**AG**T**G**-**GC**CA**AT**CT**CGT**

FAM21

Cen.ref **ATAG**TC**AAAG**T**CTTACT**CA**AGCC**AG**CTGG**CG**CTGG**CT**CAC**GC**CTGTA**AT**CC**AG**CACT**TTGG**GAG**GC**CA**AG**CG**GG**AG**AT**TC**AC**--**GG**GT**CAG**GAG**AT  
 BP **ATAG**TC**AAAG**T**CTTACT**CA**AGCC**AG**CTGG**CG**CTGG**CT**CAC**GC**CTGTA**AT**CC**AG**CACT**TTGG**GAG**GC**CA**AG**CG**GG**AG**AT**TC**AC**--**GG**GT**CAG**GAG**AT  
 Tel.ref **A**--**G**CA**AAA**CT**CTTG**-**TC**TT**GG**CC**----**GG**CG**CA**GTGG**CT**CAC**GC**CTGTA**AT**CC**AG**CACT**TTGG**GAG**GC**CA**AG**CG**GG**AG**AT**TC**AC**--**GG**GT**CAG**GAG**AT

FAM23\_d1  
 Cen.ref **A**TTT**TGAAGT**--**GCTGCACAAGGCCGGCTCACA**CCTGTAATCC**AGCACTTTGGGAGGCCAAGGCGGG**TG**GATCACGAGGTCAGGAGT**CA**AGACCA**G**ACTGA**CAA  
 BP **A**TTT**TGAAGT**--**GCTGCACAAGGCCGGCTCACA**CCTGTAATCC**AGCACTTTGGGAGGCCAAGGCGGG**C**AGATCACGAGGTCAGGAGAT**FG**AGACCA**T**CTGGCTCAA**  
 Tel.ref **A**AAAA**ACA**T**ACGCTGGCA**C**AGT**--**GGCTCATG**CCTGTAATCC**AGCACTTTGGGAGGCCAAGGCGGG**C**AGATCACGAGGTCAGGAGAT**FG**AGACCA**T**CTGGCTCAA**

FAM24  
 Cen.ref **CAGTGCA**----**GGCCGGGTCTGTGGCTCAGTCTGTAAT**CC**AGCACTTTGGGAGGCCGAGGCAGGCAGAT**TC**CTTGAG**CC**CAGGAGT**AC**AGTAC**---**TACTTATCAA**  
 BP **CAGTGCA**----**GGCCGGGTCTGTGGCTCAGTCTGTAAT**CC**AGCACTTTGGGAGGCCGAGGCAGGCAGAT**CA**CTTGAG**GT**CAGGAGAT**FG**AGACCA**T**CTGGCTCAA**  
 Tel.ref **CAC**T**GC**ACT**GGG**CA**AGACA**GGTGGCTCAG**CTGTAAT**CC**AGCACTTTGGGAGGCCGAGGCAGGCAGAT**CA**CTTGAG**GT**CAGGAGAT**FG**AGACCA**T**CTGGCTCAA**

FAM25  
 Cen.ref **CCAGCACTTTGGGAGGCCAAGGCAGGAGATCACGAGGTCAGGAGAT**CG**AGACCA**T**CCTGGCTAACAT**GGT**GAAACCC**T**GTC**CT**ACT**AAAA**A**T**TACAAAAA**A**T**  
 BP **CCAGCACTTTGGGAGGCCAAGGCAGGAGATCACGAGGTCAGGAGAT**CG**AGACCA**T**CCTGGT**T**AACAC**GGT**GAAACCC**T**GTC**CT**ACT**AAAA**A**---**TACAAAAA**---**T**  
 Tel.ref ---**CCAGCACTTTGGGAGGCCAAGGCAGGAGAT**CG**AGACCA**T**CCTGGT**T**AACAC**GGT**GAAACCC**T**GTC**CT**ACT**AAAA**A**---**TACAAAAA**---**T**

FAM26  
 Cen.ref **CAGGAGGCAGAGGCAGGAGAAT**AGT**TGAACCCGGGAGGTAGGCTGCAGT**AG**CCAAAGAT**CC**GCCACTGCCTCC**AG**AGCA**AG**ACT**CT**GTCT**CA**AA**A**AC**AA**AGACAAAA**CA**AA**  
 BP **CAGGAGGCAGAGGCAGGAGAAT**AGT**TGAACCCGGGAGGTAGGCTGCAGT**AG**CCAAAGAT**CC**GCCACTGCCTCC**-----**AGCT**CT**GC**CA**AG**CG**AG**CT**CGTCTCAA**  
 Tel.ref **CGG**AG**GC**T**GAG**GC**AGGAGAAT**AG**CTGAACCTGGGAGGTAGGCTGCAGT**AG**CCAAAGAT**CC**GCCACTGCCTCC**-----**AGCT**CT**GC**CA**AG**CG**AG**CT**CGTCTCAA**

FAM27  
 Cen.ref **ATTTTTTAAAGAAGAA**T**AAAGATCA**-----**GGTGCAGTGGCTCAGCCTGTAATCC**---**AACAATT**-----**TTGGAGACCGAG**AT**GGGTGGTT**C**ACTTGGGCC**  
 BP **ATTTTTTAAAGAAGAA**T**AAAGATCA**-----**GGTGCAGTGGCTCAGCCTGTAATCC**---**CAACA**CT**CGACACTCT**GG**AGCC**AG**GCAGGTGGAG**C**ACCGAAGGT**  
 Tel.ref **ATA**AAA**TAAAGATATT**T**CTATTTT**AG**CGTGG**GGT**GC**T**CAGCCTGTAATCC**---**CAACA**CT**CGACACTCT**GG**AGCC**AG**GCAGGTGGAG**C**ACCGAAGGT**

FAM28\_d1  
 Cen.ref **TTTTTGAGATGGA**T**CTCACTCTGTCC**CC**CGCC**CC**AGGCTGGAGTGCAGTGGCACAATCTCGGCT**CA**CTGCAAGCTCC**GC**CTCC**T**GGGTTCA**T**GCCATTCTCCTGCCTCAGCCT**  
 BP **TTTTTGAGATGGA**T**CTCACTCTGTCC**CC**CGCC**CC**AGGCTGGAGTGCAGTGGCACAATCTCGGCT**CA**CTGCAAGCTCC**A**CTCC**CG**GGTTCA**CG**CCATTCTCCTGCCTCAGCCT**  
 Tel.ref **TTTTTGAGATGGA**T**CTCACTCTGTCA**---**CCAGGCTGGAGTGCAGTGGCACAATCTCGGCT**CA**CTGCAAGCTCC**A**CTCC**CG**GGTTCA**CG**CCATTCTCCTGCCTCAGCCT**

FAM29  
 Cen.ref **GAGAT**GC**ACC**ACT**GCCTCCAGCCTGGG**T**GACAGAGCGAGACTCC**CT**CTCA**AG**AAAAAAAAAAAA**CA**AAAA**AA--**AACA**CA**AA**CA**AAAAAACA**CA**CACTGC**--**CCGG**GG**AGTT**CA**AG**  
 BP **GAGAT**GC**ACC**ACT**GCCTCCAGCCTGGG**T**GACAGAGCGAGACTCC**CT**CTCA**AG**AAAAAAAAAAAA**CA**AAAA**CT**GT**AG**GGATGT**CA**TGGGTGTGTGGCCGGTGCCT**T**GCCTTCCAG**  
 Tel.ref **GAGAT**GC**CC**CA**CTGCCTCCAGCCTGGG**C**GACAGAGCGAGACTCC**A**TCTC**---**AAAAAAAAAAAA**CA**AAAA**CT**GT**AG**GGATGT**CA**TGGGTGTGTGGCCGGTGCCT**T**GCCTTCCAG**

FAM30  
 Cen.ref **TGCCTCAGCCTCC**CA**AGTAA**CG**GA**T**TACA**GG**AGCC**AC**CA**G**ATG**CC**GGCT**AA**TT**TT**GT**TT**TT**AG**TAG**AG**AT**GG**GT**TC**AC**---**AT**GT**TGGC**C**AG**GG**CTGT**-----  
 BP **TGCCTCAGCCTCC**CA**AGTAA**CG**GA**T**TACA**GG**AGCC**CT**CA**AG**AAAAAAAAAAAA**CA**AAAA**CT**GT**AG**GGATGT**CA**TGGGTGTGTGGCCGGTGCCT**T**GCCTTCCAG**  
 Tel.ref **TGC**CC**CA**CC**AC**GT**GT**C**CGGA**---**ACTGGG**T**GTCT**CC**CC**CA**ACT**T**CT**GG**AA**CT**GG**CA**CAGAA**---**TGT**AT**CT**TA**AGT**AT**CACT**TA**AGT**AA**TT**C**AG**AA**AG**AA**AGAA**

FAM31  
 Cen.ref **ATCCGCTGCCTTGGCCTCCAGTGTGATTCAGGCA**T**GAGCC**A---**CTG**CC**CC**AG**CC**T**CA**---**AGG**-**TG**-**TT**T**G**A**CCTAAGAG**TGG**GAT**T**TAAG**  
 BP **ATCCGCTGCCTTGGCCTCCAGTGTGATTCAGGCA**T**GAGCC**TGG**AGCC**T**GACC**CA**CC**T**GACC**CC**AGC**-**CTG**-**GT**CC**AGGGAAGAGCC**TAT**GTGCAG**A  
 Tel.ref -----**GCA**-**GAGCC**-----**CTCAG**CA**TA**T**GG**CT**GT**CA**AGT**GT**CCA**GG**GAAGAGCC**TAT**GTGCAG**A

FAM32  
 Cen.ref **CCTCCAGGCTCAAGCAA**T**GCTC**---**CTGCTCAGCTTCC**CA**AGTGGCTGTGATGACTGGAAC**GT**CC**CA**TGTC**CG**G**TA**ATT**TC**TT**T**CT**AT**TT**TT**TG**---**T**  
 BP **CCTCCAGGCTCAAGCAA**T**GCTC**---**CTGCTCAGCTTCC**CA**AGTGGCTGTGATGACTGGAAC**GT**CC**CA**TGTC**CG**G**TA**ATT**TC**TT**T**CT**AT**TT**TT**TG**---**T**  
 Tel.ref **GA**T**GT**GA**GCT**GA**ACT**TT**GT**AT**CT**CA**AGCT**CT**GT**AT**CC**T**CAT**GT**G**---**CC**CA**AGGAC**AG**CC**T**CA**-**GT**TT**AG**AA**TC**ACT**CC**CA**CT**GT**GCCGAT**

FAM33  
 Cen.ref **AGGCA**GG**CA**G**AT**CA**CAGGTCAGCAGATTGAGACCAT**CT**AGCTAACACGGT**G**AAACCC**CT**GT**T**CTACT**AAAA**A**T**AG**AAAA**AAAA**AG**GG**TT**GGC**GT**GGTGGC**T**CA**  
 BP **AGGCA**GG**CA**G**AT**CA**CAGGTCAGCAGATTGAGACCAT**CT**AGCTAACACGGT**G**AAACCC**CT**GT**T**CTACT**AAAA**A**CA**C**-----**AAAAA**TT**AG**CC**GGT**GT**GGTGGC**GG**G**  
 Tel.ref **AGG**CG**GGT**G**AT**CA**CAGGTCAGCAGATTGAGACCAT**CT**AGCTAACACGGT**G**AAACCC**CT**GT**T**CTACT**AAAA**A**CA**C**-----**AAAAA**TT**AG**CC**GGT**GT**GGTGGC**GG**G**

FAM34  
 Cen.ref **GGAGGCCGAGGC**GG**AGGAT**GA**T**G**AGGTCAGGAGATTGAGACCAT**C**CTGGCTAACACAGT**G**AAACCC**CA**T**CT**ACT**AAAA**A**T**ACAAAA**G---  
 BP **GGAGGCCGAGGC**GG**AGGAT**GA**T**G**AGGTCAGGAGATTGAGACCAT**C**CTGGCTAACACAGT**G**AAACCC**CT**GT**CT**ACT**AAAA**A**T**ACAAAA**CA**AA**  
 Tel.ref **GGAGGCCGAGGC**AG**GCAGAT**CA**G**G**AGGTCAGGAGATTGAGACCAT**C**CTGGCTAACACAGT**G**AAACCC**CT**GT**CT**ACT**AAAA**A**T**ACAAAA**CA**AA**

FAM35  
 Cen.ref **GAGGTCAGGAGATTGAGACCATCCTGGCTAACACAGT**G**AAACCC**CA**T**CT**ACT**AAAA**A**T**ACAAAA**G**TTAG**CT**GGG**CC**GGTGGC**T**CACCTGTG**GT**C**  
 BP **GAGGTCAGGAGATTGAGACCATCCTGGCTAACACAGT**G**AAACCC**CA**T**CT**ACT**AAAA**A**CA**CA**CA**AA**TT**AG**CT**GA**CG**TGGTGGC**GT**GCCTGT**AG**TC**  
 Cen.ref **CCAGCTACT**T**GGG**AG**CC**CA**GT**C**AGGAGAA**T**CT**T**GAA**CC**CA**AG**GC**T**GAG**GT**TGCAG**-----  
 BP **CCAGCTACT**T**GGG**AG**CC**CA**GT**C**AGGAGAA**T**CT**T**GAA**CC**CA**AG**GC**T**GAG**GT**TGCAG**-----  
 Tel.ref -----**GGACT**GC**AG**GG**CT**CA**CT**CA**AA**AG**CC**AG**ATGC**TT**AT**GA**AGT**CT**TCT**T**G**TC**AG**CT**CC**GG**CA**AG**GC**AT**GT**GT**GGG**CA**CC**CT**GT**CT**AG**  
 BP **GA**---**CG**AG**CT**CC**AT**CC**AAAA**AA**AAAA**AA**AAAA**CA**AG**CT**GT**CC**CTGGG**CT**TGA**AG**CTGG**AG**CC**CT**GGAT**CA**AT**CT**GAG**CC**AC**AG**GAC**  
 Tel.ref **CC**AG**CC**CT**AG**TC**CG**TT**GG**A**ATC**AG**CA**CA**ATT**-**CG**GC**CT**GT**CC**CT**GGG**CT**TGA**AG**CTGG**AG**CC**CT**GGAT**CA**AT**CT**GAG**CC**AC**AG**GAC**

FAM36, FAM37, FAM38 CD1

Cen.ref GGTGAGAGCAGCCT----AACATGGTGAACCCATCTCTACTAAAAATAC---AAAACTTAGCCAGGCGTGGTGGTGGCGCGCTGTAGTCCAGCAGCTTGGG  
 BP\_FAM36 GGTGAGAGCAGCCT----AACATGGTGAACCCATCTCTACTAAAAATAC---AAAAATTAGCCAGGCGTGGTGGCGCGCGCTGTAGTCCAGCAGCTTGGAG  
 BP\_FAM37 GGTGAGAGCAGCCT----AACATGGTGAACCCATCTCTACTAAAAATAC---AAAAATTAGCCAGGCGTGGTGGCGCGCGCTGTAGTCCAGCAGCTTGGAG  
 BP\_FAM38 GGTGAGAGCAGCCT----AACATGGTGAACCCATCTCTACTAAAAATAC---AAAAATTAGCCAGGCGTGGTGGCGCGCGCTGTAGTCCAGCAGCTTGGAG  
 Tel.ref GATCGAGATCATCCTGGCTAACCGGTGAACCTGTCTCTACTAAAAAATAATTAATAATTAGCCAGGCGTGGTGGCGCGCGCTGTAGTCCAGCAGCTTGGAG

FAM39

Cen.ref CATCTCTACTAAAAATACAAACTTAGCCAGGCGTGGTGGTGGCGCGCTGTAGTCCAGCTACTTGGGAGGCTGAGGCAAGGAAATCACTTGAACCCAGAGAGGCA  
 BP CATCTCTACTAAAAATACAAACTTAGCCAGGCGTGGTGGTGGCGCGCTGTAGTCCAGCTACTTGGGAGGCTGAGGCAAGGAAATCACTTGAACCCAGAGATGTC  
 Tel.ref CAACCTGTACAAAAAATGCAAAATTAGCCGGGTGTGGTATGCAAGCCTGTAGTCCAGCTACTTGGGAGGCTGAGGCAAGGAAATCACTTGAACCCAGAGATGTC

FAM40

Cen.ref A--AAACAAGTCTCGGGCGCAATGGCTCAGCCTGTAATCCAGCATTTTGGAGGCCAAGGGCGTGGTAAATTTGAGGCCAGGAGTTTAAAGACCAACCTGGACAAACA 153  
 BP A--AAACAAGTCTCGGGCGCAATGGCTCAGCCTGTAATCCAGCATTTTGGAGGCCAAGGGCGGCGGATCACA--AGGTCAAGGAGATTGAGACCAATCTGGCTAAC  
 Tel.ref ATTAAAAAATTAGCCAGGCGTGGTGGCGCGCCTGTAATCCAGCATTTTGAAGGCCAAGGGCGGCGGATCACA--AGGTCAAGGAGATTGAGACCAATCTGGCTAAC-

FAM44, FAM45 CD2

Cen.ref TGGAGGCACTCACCTGTAACTCCAGCAACTGGGAGGCTGAGGCGGAGAATGCTTGAACCCAGGAGCGGAGCTTGCAGTGAACCCAGATGGCCCACTGCACTCCAG  
 BP\_FAM44 TGGAGGCACTCACCTGTAACTCCAGCAACTGGGAGGCTGAGGCGGAGAATGCTTGAACCCAGGAGCGGAGCTTGCAGTGAACCCAGATGGCCCACTGCACTCCAG  
 BP\_FAM45 TGGAGGCACTCACCTGTAACTCCAGCAACTGGGAGGCTGAGGCGGAGAATGCTTGAACCCAGGAGCGGAGCTTGCAGTGAACCCAGATGGCCCACTGCACTCCAG  
 Tel.ref CCGTGGCGGTGTCTATAGTCCAGCTACTCGGAGACTGAGGAGGAGAATAGCTTGAACCCAGGAGCGGAGCTTGCAGTGAACCCAGATGGCCCACTGCACTCCAG

FAM46\_d1

Cen.ref GAGCGGGTGATCACGAGGTCAGGAGATTGAGACCATTCTGGCTAACACGGTGAACCCGTCTCTACTAAAAATACAAAAAATTAGCCGGGTGTGGTGGCGG  
 BP GAGCGGGTGATCACGAGGTCAGGAGATTGAGACCATTCTGGCTAACACGGTGAACCCGTCTCTACTAAAAAATACAAAAAATTAGCTGGCGTGGTGGCGAG  
 Tel.ref GAGGTGGCGATCACGAGGTCAGGAGATTGAGACCATTCTGGCTAACACGGTGAACCCGTCTCTACTAAAAAATACAAAAAATTAGCTGGCGTGGTGGCGAG

FAM47\_d1

Cen.ref GATCACGAGGTCAGGAGATTGAGACCATTCTGGCTAACACGGTGAACCCGTCTCTACTAAAAATACAAAAAATTAGCCGGGTGTGGTGGCGGCGCC-TGTA  
 BP GATCACGAGGTCAGGAGATTGAGACCATTCTGGCTAACACGGTGAACCCGTCTCTACTAAAAATACAAAAAATTAGCCGGGTGTGGTGGCGGCGCC-TGTA  
 Tel.ref GATCACGAGGTCAGGAGATTGAGACCATTCTGGCTAACACGGTGAACCCGTCTCTACTAAAAATACAAAAAATTAGCCGGGTGTGGTGGCGGCGCC-TGTA

FAM48

Cen.ref CCTGTCTCTACTAAAAATACAAAAAATTAGCCGGGTGTGGTGGTGGCGGCGCCTGTAGTCCAGCCACTCGGGAGGCTGAGGCAGGAGAATGGCAATGAACCT  
 BP CCTGTCTCTACTAAAAATACAAAAAATTAGCCGGGTGTGGTGGTGGCGGCGCCTGTAGTCCAGCCACTCGGGAGGCTGAGGCAGGAGAATGGCTGAACCC  
 Tel.ref CCTGTCTCTACTAAAAA-----TTAGCCAGGTGTGGTGGCGAAGCCTGTAGTCCAGCCACTCGGGAGGCTGAGGCAGGAGAATGGCTGAACCC

FAM49

Cen.ref CTCGGGAGGCTGAGGCAGGAGAATTGGCATGAACCTGGGAGGCGGAGCTTACAGCGAGCTGAGATTGGCCCACTGCACTCCAGCCATGGG  
 BP CTCGGGAGGCTGAGGCAGGAGAATTGGCATGAACCTGGGAGGCGGAGCTTGCAGTAAGCTGAGATTGCCCACTGCACTCCAGCCATGGG  
 Tel.ref CTCGGAGGCTGAGGCAGGAGAATTGGTGAACCTGGGAGGCGGAGCTTGCAGTAAGCTGAGATTGCCCACTGCACTCCAGCCATGGG

FAM50, FAM51 CD3

Cen.ref GAGGTGAGGAGTTGGAGACCACTTGTCCACATGCGC----GAAACCCCATCTCTAC--TAAAAATA----CAAAAACTAGCAAGGCGTAGTAGTCCCTATATCCCA  
 BP\_FAM50 GAGGTGAGGAGTTGGAGACCACTTGTCCACATGCGC----GAAACCCCATCTCTACACTCCAAAGAGCCCAAGCCTGGCA--GGCATCAGAGCG--GAGTCTGCAACCCCT  
 BP\_FAM51 GAGGTGAGGAGTTGGAGACCACTTGTCCACATGCGC----GAAACCCCATCTCTACACTCCAAAGAGCCCAAGCCTGGCA--GGCATCAGAGCG--GAGTCTGCAACCCCT  
 Tel.ref ----TGAATAGACAGTGGCAACCTGCCCATGTGGGTCTGGGCAAAATGGGACACTCCAAAGAGCCCAAGCCTGGCA--GGCATCAGAGCG--GAGTCTGCAACCCCT

FAM52

Cen.ref GAGGCTGAGCAAGAGAATCGCTTGAACCTAAGATGTGGAGTTGCAGTGAAGCAA--GATCTCGCCTCTGCACTCCAGCCCTGGGTGACAGAGTGAAGCTCAACTAAAAAA  
 BP GAGGCTGAGCAAGAGAATCGCTTGAACCTAAGATGTGGAGTTGCAGTGAAGCAA--TATTGCATGTATCACAAATATG--TGGGAGCTAAAAAGTGGCTCTTGTGGAGGTAG  
 Tel.ref GATGCAACTGAAGGCCATTATGTTAAG-TGAATAAGCCAGGCAAGAGGACAAATATTGCATGTATCACAAATATG--TGGGAGCTAAAAAGTGGCTCTTGTGGAGGTAG

FAM53

Cen.ref AAAAAAATAAAA--AAAAACAAATACGCTGGGCAAGTGGCTCATGCCTGTAATCCCAAGACTTTGGGAGGCCAAGGCGGGCAGATCACGAGGTCAGGAGATTGAGA  
 BP -AAAAAATAAAA--AAAAACAAATACGCTGGGCAAGTGGCTCATGCCTGTAATCCCAAGACTTTGGGAGGCCAAGGCGGGCAGATCACGAGGTCAGGAGATTGAGA  
 Tel.ref A--TTAGTAAAAATTAACACAA--GCCGGGCGCAGCGGCTTACACCTGTAATCCCAAGACTTTGGGAGGCCAAGGCGGGCAGATCACGAGGTCAGGAGATTGAGA

FAM54

Cen.ref GCTGGGTGTGGTGGCAGGTGCCCTGTAGTCTGAGCTACTGGAGAGGCTGAGGCAGGAGAATGGTGTGAACCCGGGAGGCGGAGCTTGCAGTAAAGTGAATATCG  
 BP GCTGGGTGTGGTGGCAGGTGCCCTGTAGTCTGAGCTACTGGAGAGGCTGAGGCAGGAGAATGGTGTGAACCCGGGAGGCTGGAGCTTGCAGTGAAGTGAATATCG  
 Tel.ref GCGGGCAATGGTGGCACAATGCCCTAATGCCAGCTACTGTGAGGCTGAGGCAGGAGAATGGTGTGAACCCGGGAGGCTGGAGCTTGCAGTGAAGTGAATATCG

FAM55

Cen.ref TATAAAAACAGTTAACACTTG--GCCAGGAGCAGTGGCTCACACCTATAATCCAGCACTTTGGGAGGCCAAGGCGGGCAGATCACGAGGTCAGAGATCGAGATCATCCTGGCT  
 BP TATAAAAACAGTTAACACTTG--GCCAGGAGCAGTGGCTCACACCTATAATCCAGCACTTTGGGAGGCCAAGGCGGGCAGATCACGAGGTCAGAGATCGAGATCATCCTGGCT  
 Tel.ref CATTAGTAANAATTAACACAAAGCCGGCGCAGCGGCTTACACCTGTAAATCCAGCACTTTGGGAGGCCAAGGCGGGCAGATCACGAGGTCAGAGATCGAGATCATCCTGGCT

FAM56  
 Cen.ref **ACGAGGTC**AAAGAGATCGAGATCATCTGGCTAACACGGTGAAACCT**GTCTCTACTAAAAA**AAATT**AAAAAATTAGCCAGGCC**TGGTGGCGGGCGCCT**GTAA**TCCCA  
 BP **ACGAGGTC**AAAGAGATCGAGATCATCTGGCTAACACGGTGAAACCT**GTCTCTACTAAAAA**TACA-AAAAAATTAGCCAGGCC**GGCG**TGGTGGTGGGCACC**AGTAG**TCCCA  
 Tel.ref **ACGAGGTC**AAAGAGATCGAGATCATCTGGCTAACATGGTGAAACCT**GTCTCTACTAAAAA**TACA-AAAAAATTAGCCAGGCC**GGCG**TGGTGGTGGGCACC**AGTAG**TCCCA

FAM57  
 Cen.ref **TGAGACCATTCTGGCTAACATGG**GAAACCC**TGACTCTA**TTAAAAATACAAAAAA**ATTAGCCAGG**CGTGGTGGC-GGCT**CCTGTAGTCCCAGCTACTCT**GGAGGCTGA**GG**  
 BP **TGAGACCATTCTGGCTAACATGG**GAAACCC**TGACTCTA**TTAAAAATACAAAAAA**ATTAGCCAGG**TGTGGTGGCAGGCC**CCTGTAGTCCCAGCTACTCA**GGAGGCTGA**AA**  
 Tel.ref **CGAGACCATTCTGGCTAACATGG**TGAGACCC**CATCTCTA**CCAAAT**TACAAAA**--**ATTAGCCAGG**TGTGGTGGCAGGCC**CCTGTAGTCCCAGCTACTCA**GGAGGCTGA**AA**

FAM46\_d2, FAM63\_d2, FAM58, FAM59, FAM60 CD4  
 Cen.ref **CTCAATGCAGCCCTCAACCTCCTCGGCTTAAGTAA**TCAT**CTGCCTCAGCCGGTA**AGTAGCCAGGACCACAGGTGCTT**CCA**CCACAC**CCAGC**TAAT**T**  
 BP FAM46d2 **CTCAATGCAGCCCTCAACCTCCTCGGCTTAAGTAA**TCAT**CTGCCTCAGCCGGTA**TT**CTCAAAA**AAAGAAAATA**AAAAAATTAGCCAGGC**ATGGT  
 BP FAM63d2 **CTCAATGCAGCCCTCAACCTCCTCGGCTTAAGTAA**TCAT**CTGCCTCAGCCGGTA**TT**CTCAAAA**AAAGAAAATA**AAAAAATTAGCCAGGC**ATGGT  
 BP FAM58 **CTCAATGCAGCCCTCAACCTCCTCGGCTTAAGTAA**TCAT**CTGCCTCAGCCGGTA**TT**CTCAAAA**AAAGAAAATA**AAAAAATTAGCCAGGC**ATGGT  
 BP FAM59 **CTCAATGCAGCCCTCAACCTCCTCGGCTTAAGTAA**TCAT**CTGCCTCAGCCGGTA**TT**CTCAAAA**AAAGAAAATA**AAAAAATTAGCCAGGC**ATGGT  
 BP FAM60 **CTCAATGCAGCCCTCAACCTCCTCGGCTTAAGTAA**TCAT**CTGCCTCAGCCGGTA**TT**CTCAAAA**AAAGAAAATA**AAAAAATTAGCCAGGC**ATGGT  
 Tel.ref **ACCACTGC**ACTC-CAGCA**TGGGCGACAGAGCGCA**AA-**ATTCTG**-----**TCTCAAAA**AAAGAAAATA**AAAAAATTAGCCAGGC**ATGGT

FAM47\_d2  
 Cen.ref **ATGGTAGTGCACACTGTAATCCAGCTACTCAGGAG**CTGAGGCAGGAGAATAGCTTGAAAGGGG**CAGCGGA**GT**TTGCAGTGAGCCGAG**AGGT  
 BP **ATGGTAGTGCACACTGTAATCCAGCTACTCAGGAG**CTGAGGCAGGAGAATAGCTTGAA**CCGGAGCGGA**-**CTGCAGTGAA**CCAGATGGC  
 Tel.ref **GC**GGTGC**CG**GGTGT**CTA**TAGTCCAGCTACTC**GGAG**ACTGAGGCAGGAGAATAGCTTGAA**CCGGT**AG**CGCGGA**CT**TTGCAGTGAA**CCAGATGGC

FAM28\_d2  
 Cen.ref **ATCAAGGTC**CCAG-CCGGGCACGGTGGCTCA**GCCTGTAATCCAGCACTTGGGAGGC**TGAGGCGGGGAGAT**CACAAGGTCAGGAGATCA**AGACT**CCCTGGCTAAC**T  
 BP **ATCAAGGTC**CCAG-CCGGGCACGGTGGCTCA**GCCTGTAATCCAGCACTTGGGAGGC**TGAGGCGGGGAGAT**TACAAGGTCAGGAGATCA**GAGACT**CCCTGGCTAAC**C  
 Tel.ref **TTA**AGAAA**CCGG**CCGGGCACGGTGGCTCA**GCCTGTAATCCAGCACTTGGGAGGC**TGAGGCGGGGAGAT**TACAAGGTCAGGAGATCA**GAGACT**CCCTGGCTAAC**C

FAM67  
 Cen.ref **CCGTCTCTACTAAAAATACAAAAATTAGCCGGCG**CA**GTGGCGGACGCC**TGTAGT**CTCAGCTACTCGGGA**GGCTGAGGCAGGAGAATG  
 BP **CCGTCTCTACTAAAAATACAAAAATTAGCCGGCG**CA**GTGGCGGACGCC**-TGTAGT**CTCAGCTACTCGGGA**GGCTGAGGCAGGAGAATG  
 Tel.ref **CAGTCTCTACTAAAAATACAAAAATTAGCCGGCG**CA**GTGGCGGACGCC**-TGTAGT**CTCAGCTACTCGGGA**GGCTGAGGCAGGAGAATG

FAM68  
 Cen.ref **ACTAAAAATACA**AAAAAATTAGCTAGGT**CGGTGGCGGGTGTCTA**TAGTCCAGCTACTCGGGAG**CTGAGGCAGGAGAATAGCTGGA**ACC**CGGTAGC**CGG  
 BP **ACTAAAAATACA**AAAAAATTAGCTAGGT**CGGTGGCGGGTGTCTA**TAGTCCAGCTACTCGGGAG**CTGAGGCAGGAGAATAGCTGGA**ACC**CGGTAGC**CGG  
 Tel.ref **GCTAAAAA**ATAC**AAAAAATTAGCTGGCG**TGGTGGC**AGT**CAC**CTGTAGTCCAGCTACTCGGGAG**CTGAGGCAGGAGAAT**GGCTGAA**CC**TGGAGGTGG**

FAM71  
 Cen.ref **CAGATCAAAATGAGTTTACCAAGA**ACCC**GCATCTGTG**ATGAAC**GCACAGAAA**---GCATGGCC**CTGGCGACGTCAGCA**---TGCT**GGCAGGA**---TGCT**CCATC**-TGT  
 BP **CAGATCAAAATGAGTTTACCAAGA**ACCC**GCATCTGTG**ATGAAC**GCACAGAAA**CTTTGGAGGCC**AGGCGGGTGGATCACCTGAGG**TCGGAGTT**TGAGCCAGC**CTGAC  
 Tel.ref **AAA**AAAA**CTGAG**GCCAGG**CTCAG**TGGTGC**CTCCTGT**ANTC-----**CCAGCA**CTTTGGAGGCC**AGGCGGGTGGATCACCTGAGG**TCGGAGTT**TGAGCCAGC**CTGAC

FAM73  
 Cen.ref **CAGTTTGGCTCT-TGTC**A**TCCAGGCTGGAGTGC**AATGGC**ACAATCTCA**CT**CTCAG**TACA**ACCTCC**CGCTCC**CAAGTTCAAGCGATTCTCCTGCCTCAGCTCC**ACA  
 BP **CAGTTTGGCTCT-TGTC**A**TCCAGGCTGGAGTGC**AATGGC**ACAATCTCA**CT**CTCAG**GGC**ACCTCC**ACCTCC**CAAGTTCAAGCGATTCTCCTGCCTCAGCTCC**TGAG  
 Tel.ref **GAG**GGAGT**CTCAC**T**GTG**C**TCCAGGCTGGAGTGC**AATGGC**GGATCTCA**-**CTCAG**GGC**ACCTCC**ACCTCC**CAAGTTCAAGCGATTCTCCTGCCTCAGCTCC**TGAG

FAM74  
 Cen.ref **TCTTGA**ACTCCTGACCT**AGGTGATCTGC**CCGC**CTCAGCCTCCAAAGTGCTGGGATTACAGG**TGTGAGCCACCG**CACTGGCC**TTGGCCT**GAA**--**CTTATGC**-  
 BP **TCTTGA**ACTCCTGACCT**AGGTGATCTGC**CCGC**CTCAGCCTCCAAAGTGCTGGGATTACAGG**AGTGAGCCACCG**CGCTGGCC**ACA**AAATGGA**GTCT**TTATCC**  
 Tel.ref **TCTCA**AT**CTCCTGACCT**T--TGAT**CATCCGCCTCG**CCCTCC**AAAGTGCTGGGATTACAGG**AGTGAGCCACCG**CGCTGGCC**ACA**AAATGGA**GTCT**TTATCC**

FAM75, FAM76, FAM77, FAM78, FAM79, FAM80 CD5  
 Cen.ref **TAACTGGTGAA-ACCCAGTCTCTACTAAAAATACAAAA**-TTAGCC**AGCGTGGTGGCGG**CGCCTGTAGTCC**AGCTACTCGGGA**AGCTGAGGCAGGAGAATGGC  
 BP FAM75 **TAACTGGTGAA-ACCCAGTCTCTACTAAAAATACAAAA**-TTAGCC**AGCGTGGTGGCGG**CGCCTGTAGTCC**AGCTACTCGGGA**AGCTGAGGCAGGAGAATGGC  
 BP FAM76 **TAACTGGTGAA-ACCCAGTCTCTACTAAAAATACAAAA**-TTAGCC**AGCGTGGTGGCGG**CGCCTGTAGTCC**AGCTACTCGGGA**AGCTGAGGCAGGAGAATGGC  
 BP FAM77 **TAACTGGTGAA-ACCCAGTCTCTACTAAAAATACAAAA**-TTAGCC**AGCGTGGTGGCGG**CGCCTGTAGTCC**AGCTACTCGGGA**AGCTGAGGCAGGAGAATGGC  
 BP FAM78 **TAACTGGTGAA-ACCCAGTCTCTACTAAAAATACAAAA**-TTAGCC**AGCGTGGTGGCGG**CGCCTGTAGTCC**AGCTACTCGGGA**AGCTGAGGCAGGAGAATGGC  
 BP FAM79 **TAACTGGTGAA-ACCCAGTCTCTACTAAAAATACAAAA**-TTAGCC**AGCGTGGTGGCGG**CGCCTGTAGTCC**AGCTACTCGGGA**AGCTGAGGCAGGAGAATGGC  
 Tel.ref **AAA**AT**TACT**AA**ATAC**AA**AAAT**TACTAAAAATACAAAA**ATTAGCTGGCGTGGTGGCGG**CGCCTGTAGTCC**AGCTACTCGGGA**AGCTGAGGCAGGAGAATGGC

FAM80  
 Cen.ref **GTCAC**TGT**AAGCTCTGCCTCCC**GGT**TCAAGCC**TT**CTCTCGCCTCAGCCTCC**TGAGTAGCTGGG**ACTACAGG**T**GCCTGGCAC**CA**ACCCGGCTA**ATT**TTTC**  
 BP **GTCAC**TGT**AAGCTCTGCCTCCC**GGT**TCAAGCC**TT**CTCTCGCCTCAGCCTCC**CAAGTAGCTGGG**ACTACAGG**T**GCCTGGCAC**CA**ACCCGGCTA**ATT**TTTC**  
 Tel.ref -**TCA**CGC**AACTC**AC**CTCC**AG**GGTCA**AG**CCGTTCTCT**T**GCCTCAGCCTCC**CAAGTAGCTGGG**ACTACAGG**T**GCCTGGCAC**CA**ACCCGGCTA**ATT**TTTC**

FAM81, FAM82 CD6  
 Cen.ref **GGA**TGGG**CTGATCTCCTGACCTCA**TGAT**CCAGTGCCT**CGCCTCC**AAAGTGCTGGGATTACAGG**TGT**TGAGCCACTGGCCCGCC**CT**AACTCGC**CT**CTTT**CACAG

BP FAM81 GGATGGGCTCGATCTCCTGACCTCATGATCCACCTGCCTCGGCCTCCCAAAGTGCTGGGATTACAGGCTTGAGCCACCCTGCCAGCCC---TAACTTTTAAAATT---TT

BP FAM82 GGATGGGCTCGATCTCCTGACCTCATGATCCACCTGCCTCGGCCTCCCAAAGTGCTGGGATTACAGGCTTGAGCCACCCTGCCAGCCC---TAACTTTTAAAATT---TT

Tel.ref GGCTGGTCTGGAACTCCTGACCTCATGATCCACCTGCCTCGGCCTCCCAAAGTGCTGGGATTACAGGCTTGAGCCACCCTGCCAGCCC---TAACTTTTAAAATT---TT

FAM83

Cen.ref TCGATCTCCTGACCTCATGATCCACCTGCCTCGGCCTCCCAAAGTGCTGGGATTACAGGCTTGAGCCACCCTGCCAGCCC---TAACTTTTAAAATT---TT

BP TCGATCTCCTGACCTCATGATCCACCTGCCTCGGCCTCCCAAAGTGCTGGGATTACAGGCTTGAGCCACCCTGCCAGCCC---TAACTTTTAAAATT---TT

Tel.ref TTGATCTCCTGACCTCATGATCCACCTGCCTCGGCCTCCCAAAGTGCTGGGATTACAGGCTTGAGCCACCCTGCCAGCCC---TAACTTTTAAAATT---TT

FAM87

Cen.ref GATTACAAGGTCAGGAGATCGAGACCATCCTGGCTAACACCGGTGAAACCCTGTCTCTACTAAAATACAAA---AATTAGGAGGGCATGGTGCGCGTGCCTG

BP GATTACAAGGTCAGGAGATCGAGACCATCCTGGCTAACACCGGTGAAACCCTGTCTCTACTAAAATACAAA---AATTAGGAGGGCATGGTGCGCGTGCCTG

Tel.ref GATTACAAGGTCAGGAGATCGAGACCATCCTGGCTAACACCGGTGAAACCCTGTCTCTACTAAAATACAAA---AATTAGGAGGGCATGGTGCGCGTGCCTG

FAM23\_d2

Cen.ref AAAACAAAAAAACTGGAGGCCAGGCTCA GTGGGTCCCTCCTGTAATCCAGCACTTTGGGAGGCCGAGGCGGGTGATCACCTGAGGTCG

BP AAAACAAAAAAACTGGAGGCCAGGCTCA GTGGGTCCCTCCTGTAATCCAGCACTTTGGGAGGCCGAGGCGGGTGATCACCTGAGGTCG

Tel.ref -----AAAAAAAGCGCTTTG-----GTGGCGCGGGCCTGTAATCCAGCACTTTGGGAGGCCGAGGCGGGTGATCACCTGAGGTCG

**B.**

FAM90, FAM91, FAM92, FAM93, FAM94 CD in FANCC

Cen.ref AGTATCTCTT---TTTCCCTGAC---TGGAGCTCCTAATGGGCA-GAGACA-----GTGAGCCGCCTTTCTCTAAGG-SCTGGCACACACAAA---ACACTTTTAGGCTGGG

BP FAM90 AGTATCTCTT---TTTCCCTGAC---TGGAGCTCCTAATGGGCA-GAGACA-AAAAGTAAA-TTTAGTTA-AAAAGATTGCTTAAATATGCTTGATCTCACTTCATTCACACGAAGAAACCATAT

BP FAM91 AGTATCTCTT---TTTCCCTGAC---TGGAGCTCCTAATGGGCA-GAGACA-AAAAGTAAA-TTTAGTTA-AAAAGATTGCTTAAATATGCTTGATCTCACTTCATTCACACGAAGAAACCATAT

BP FAM92 AGTATCTCTT---TTTCCCTGAC---TGGAGCTCCTAATGGGCA-GAGACA-AAAAGTAAA-TTTAGTTA-AAAAGATTGCTTAAATATGCTTGATCTCACTTCATTCACACGAAGAAACCATAT

BP FAM93 AGTATCTCTT---TTTCCCTGAC---TGGAGCTCCTAATGGGCA-GAGACA-AAAAGTAAA-TTTAGTTA-AAAAGATTGCTTAAATATGCTTGATCTCACTTCATTCACACGAAGAAACCATAT

BP FAM94 AGTATCTCTT---TTTCCCTGAC---TGGAGCTCCTAATGGGCA-GAGACA-AAAAGTAAA-TTTAGTTA-AAAAGATTGCTTAAATATGCTTGATCTCACTTCATTCACACGAAGAAACCATAT

Tel.ref AGTATCTCTTCAATTTCTAGAAAAAAGTAAAAATAATTTATCCACATGTAACAATTTAAGCAATCTTTAAGCTAAAAGATTGCTTAAATATGCTTGATCTCACTTCATTCACACGAAGAAACCATAT

FAM95

Cen.ref GTAGTATAAATACACAATCAGTAAATAATCATATTGATAAAGGAACA-AAACCACAGTCATCTCAATAGATCAGAAAAGCAAC-ATTTCTAACATTCTTCAATAGAAAT

BP GTAGTATAAATACACAATCAGTAAATAATCATATTGATAAAGGAACA-----ACTCCATTCAGCAGTAGGGGTGGCCA-GCAACTCAGCTGTAGCCAGTGAG-AGAGAAAAG

Tel.ref GTGCCCAATAAAAGGACCACTTCCCTACAAC-TAG-----ACTCCATTCAGCAGTAGGGGTGGCCA-GCAACTCAGCTGTAGCCAGTGAG-AGAGAAAAG

**Supp. Figure S2.** Alignment of sequences from breakpoint junctions to the reference genome. Alignments of the reference genomic sequence at the centromeric end of the breakpoint (Cen.ref) and the reference genomic sequence at the telomeric end of the breakpoint (Tel.ref) with the actual breakpoint junction sequence determined by sequencing (BP). Overlap sequence is underlined in red in the breakpoint sequence. Unaligned, inserted sequence is underlined in black in the breakpoint sequence. Yellow indicates sequence is identical in all, and blue indicates sequence is shared in two or more sequences. Alignments were done with AlignX, VNTI software (Life Technologies). **A.** *FANCA* breakpoint junctions. **B.** *FANCC* breakpoint junctions.

Supp. Figure S3A

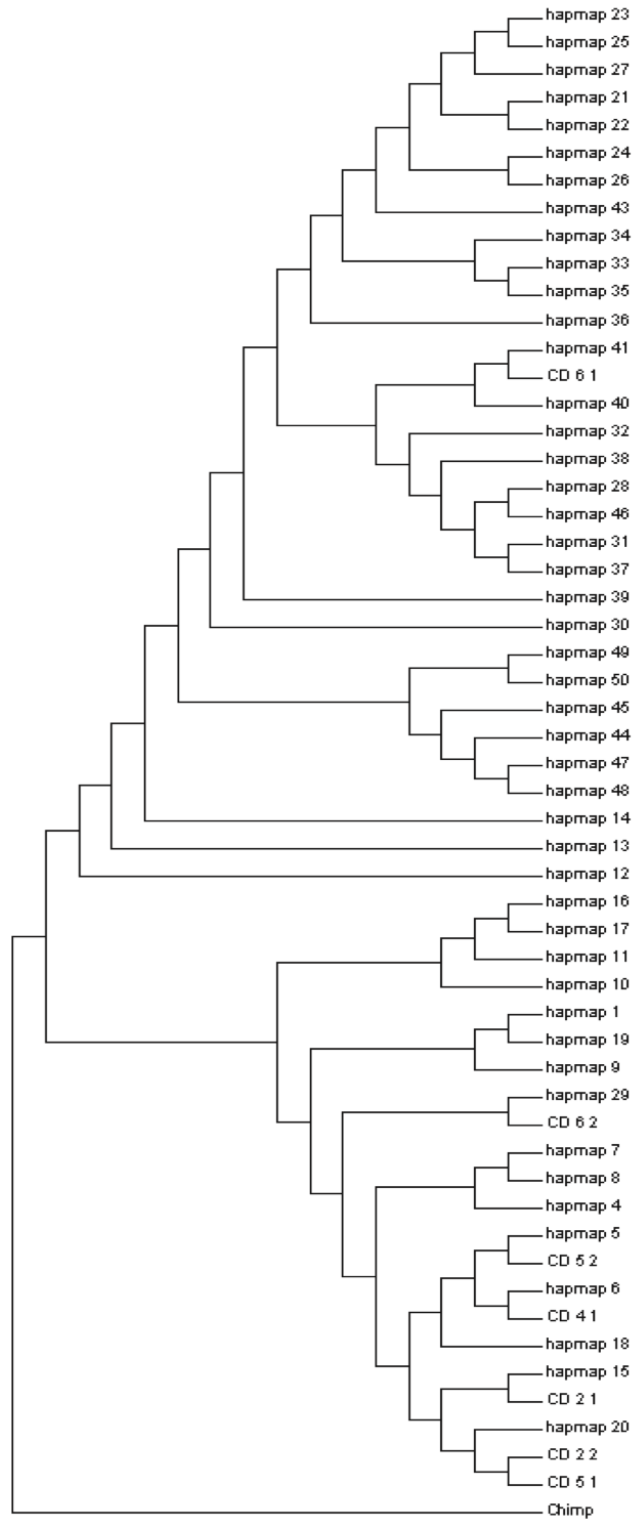



## Supp. Figure S3B

```

hapmap_1 AGTCGCGAGGGGGCTCGCTCCGCCCGATTCCCCTATAAAAATCGG
hapmap_4 AGTCGTGAGGGGGCTCGCTCCGCCCGATTCCCCTGCGAGAATCGG
hapmap_5 AGTCGTGAGGGGGCTCGCTCCGCCCGATTCCCCTGCGAGAATTGG
hapmap_6 AGTCGTGAGGGGGCTCGCTCCGCCCGATTCCCCTGCGAGAATTGT
hapmap_7 AGTCGTGAGGGGGCTCGCTCCGCCCGATTCCCCTGCGAGAGCCAG
hapmap_8 AGTCGTGAGGGGGCTCGCTCCGCCCGATTCCCCTGCGAGGGCCAG
hapmap_9 AGTCGTGAGGGGGCTCGCTCCGCCCGATTCCCCTGTA AAAAATCGG
hapmap_10 AGTCGTGAGGGGGCTCGCTTCGCCTGGACTCCCCTGTA AAAAATCGG
hapmap_11 AGTCGTGAGGGGGCTCGCTTCGTCTGGACTCCCCTGTA AAAAATCGG
hapmap_12 AGTCGTGAGGGGGCTCGTCCCGTCCAAGTCTTCTCATA AAAAATGG
hapmap_13 AGTCGTGAGGGGGCTCGTCCCGTCTAAGTCTTCTCATA AAAAATCGG
hapmap_14 AGTCGTGAGGGGGCTCGTCCCGTCTAAGTCTTCTCGTA AAAAATCGG
hapmap_15 AGTCGTGAGGGGGCTCGTTTCGTCTGGACTCCCCTGCGAGAATTGG
hapmap_16 AGTCGTGAGGGGGCTCGTTTCGTCTGGACTCCCCTGTA AAAAATCGG
hapmap_17 AGTCGTGAGGGGGCTCGTTTCGTCTGGACTCCCCTGTAGAAAATCGG
hapmap_18 AGTCGTGAGGGGGCTTGCTCCGCCCGATTCCCCTGCGAGAATTGG
hapmap_19 AGTCGTGGGATGGCCCGCTCCGCCCGATTCCCCTATA AAAAATGG
hapmap_20 AGTTGCGAGGGGGCTCGCTCCACCCCGATTCCCCTGCGAGAATTGG
hapmap_21 GTCCATAAAGGTATTTGTCCCGCCAAGTCTCCTCATA AAAAATGG
hapmap_22 GTCCATAAAGGTATTTGTCCCGCCAAGTCTCCTCATA AAAAATGG
hapmap_23 GTCCATAAAGGTATTTGTCCCGTCCAAGTCTCCTCATA AAAAATGG
hapmap_24 GTCCATAAAGGTATTTGTCCCGTCCAAGTCTTCTCATA AAAAATGG
hapmap_25 GTCCATAAAGGTATTTGTCCCGTCCAAGTCTTCTCATA AAAAATGG
hapmap_26 GTCCATAAAGGTATTTGTCCCGTCCAGTCCCCTCATA AAAAATGG
hapmap_27 GTCCATAAAGGTATTTGTCCCGTCCAAGTCTTCTCATA AAAAATGG
hapmap_28 GTCCATGAAATGGCTCATTTCTGCTGGACTCCCTCGTAGAAAATCGG
hapmap_29 GTCCATGAAGGTGCTCGCTCCACCCCGATTCCCCTGCGAAAATGG
hapmap_30 GTCCATGAAGGTGCTCGTCCCGCTAAGTCTTCTCATA AAAAATCGG
hapmap_31 GTCCATGAAGGTGCTCGTTTCGTCTGGACCCCTCGTA AAAAATCGG
hapmap_32 GTCCATGAAGGTGCTCGTTTCGTCTGGACCCCTCGTA AAAAATCGG
hapmap_33 GTCCATGAAGGTGTTTGTCCCGCCAAGTCTTCTCATA AAAAATGG
hapmap_34 GTCCATGAAGGTGTTTGTCCCGTCCAAGTCTTCTCATA AAAAATCGG
hapmap_35 GTCCATGAAGGTGTTTGTCCCGTCCAAGTCTTCTCATA AAAAATGG
hapmap_36 GTCCATGAAGGTGTTTGTCCCGTCTAAGTCTTCTCGTA AAAAATGG
hapmap_37 GTCCATGAGGGTGTCTCGTTTCGTCTGGACCCCTCGTA AAAAATCGG
hapmap_38 GTCCATGGAGGTGCTCGTTTCGTCTGGACCCCTCGTA AAAAATCGG
hapmap_39 GTCCATGGAGGTGCTCGTCCCGTCTAAGTCTTCTCATA AAAAATCGG
hapmap_40 GTCCATGGAGGTGTTCTGCTCTCCAAGTCTTCTCGGAAGGTCAG
hapmap_41 GTCCATGGAGGTGTTTGTTCGCCCCGAGTCTTCTGCGAGAGCCAG
hapmap_43 GTCCGCAAAGGTATTTGTCCCGTCCAAGTCTTCTCATA AAAAATGG
hapmap_44 GTCCGCGGGATGGCCCGTCCCGCCAAGTCTTCTCATA AAAAATGG
hapmap_45 GTCCGCGGGATGGCCCGTCCCGTCTAAGTCTTCTCATA AAAAATCGG
hapmap_46 GTCCGCGGGATGGCCCGTTCGTCTGGACTCCCCTCATA AAAAATGG
hapmap_47 GTCCGCGGGATGGCTCGTCCCGTCCAAGTCTTCTCATA AAAAATGG
hapmap_48 GTCCGCGGGATGGCTTGTCCCGTCCAAGTCTTCTCATA AAAAATGG
hapmap_49 GTCCGCGGGATGGTTTGTCCCGTCTAAGTCTTCTCATA AAAAATCGG
hapmap_50 GTCCGCGGGATGGTTTGTCCCGTCTAAGTCTTCTCATA AAAAATCGG
CD_2_1 AGTCGCGAGGGGGCTCGCTCCGCCCGATTCCCCTGCGAGAATTGG
CD_2_2 AGTCGCGAGGGGGCTCGCTCCGCCCGATTCCCCTGCGAGAATTGG
CD_4_1 AGTCGTGAGGGGGCCCGCTCCACCCCGATTCCCCTGCGAGAATTGT
CD_5_1 AGTTGCG?GGGGGCTCGC?CCGCCCG?TT??C?TGCG?G??TTGG
CD_5_2 AGTCGTG?GGGGGCTCGC?CCGCCCG?TT??C?TGCG?G??TTGG
CD_6_1 GTCCATGGAGGTGTTTGTTCGCTTGAGTCTTCTGCGAGAGCCAG
CD_6_2 AGTCGCGAGGGGGCTCGTCCACCCCGATTCCCCTGCGAAAATCGG
Chimp CCC?GTGGGGCGCGTG?ATGCGTCACAGTAGTACTCCGTTAGCCAG

```

**Supp. Figure S3.** Phylogenetic analysis of haplotypes from HAPMAP-CEU Phase 2 and FA patients with *FANCA* conserved deletions. **A.** A phylogenetic tree showing the predicted relationship of the haplotypes from *FANCA* common deletions with the unique haplotypes from the CEU population. **B.** The sequences used for the phylogenetics

analysis. There are 55 total sequences: 47 are unique haplotypes from the CEU Hapmap population (Phase 2) (labeled "hapmap\_\*"), 7 are from the FA patients with *FANCA* common deletions (labeled "CD\_\*"), and 1 is from the Chimp genome which was used as an outgroup. Missing data was not evaluated (and marked with a "?").

**Supp. Table S1. Array CGH - Targeted Genes and Their Chromosomal Region**

| <b>Gene</b>                   | <b>Genomic Region (NCBI36/hg18)*</b> |
|-------------------------------|--------------------------------------|
| <i>FANCA</i>                  | chr16:88131460-88610566**            |
| <i>FANCB</i>                  | chrX:14671450-14901105***            |
| <i>FANCC</i>                  | chr9:96701501-97319867**             |
| <i>FANCD1 (BRCA2)</i>         | chr13:31777617-31881809              |
| <i>FANCD2</i>                 | chr3:9993451-10166418****            |
| <i>FANCE</i>                  | chr6:35518116-35552859               |
| <i>FANCF</i>                  | chr11:22590655-22613963              |
| <i>FANCG</i>                  | chr9:35013835-35120013****           |
| <i>FANCI</i>                  | chr15:87578198-87671366              |
| <i>FANCL (BRIP1)</i>          | chr17:57104767-57306537              |
| <i>FANCL</i>                  | chr2:58229882-58333019               |
| <i>FANCM</i>                  | chr14:44664886-44749843              |
| <i>FANCN (PALB2)</i>          | chr16:23511984-23570179              |
| <i>FANCO (RAD51C)</i>         | chr17:54114962-54176691              |
| <i>FANCP (SLX4) (BTBD12)</i>  | chr16:3561184-3611586                |
| <i>AP1TD1 (MHF1) (CENP-S)</i> | chr1:10402746-10435459               |
| <i>BLM</i>                    | chr15:89051583-89169690              |
| <i>BRCA1</i>                  | chr17:38439840-38540994              |
| <i>CDKN2A</i>                 | chr9:21947751-21994490               |
| <i>FAAP100 (C17orf70)</i>     | chr17:77107387-77139868              |
| <i>FAAP24 (C19orf40)</i>      | chr19:38144988-38169800              |
| <i>MRE11</i>                  | chr11:93780115-93876688              |
| <i>NBN</i>                    | chr8:91004740-91076075               |
| <i>RAD50</i>                  | chr5:131910529-132017494             |
| <i>RAD51AP1</i>               | chr12:4508317-4549475                |
| <i>SMAD4</i>                  | chr18:46800581-46875407              |
| <i>STRA13 (MHF2) (CENP-X)</i> | chr17:77559868-77584062              |

\* Target regions extend 10kb beyond either side of the gene, except

\*\*Extends 200kb beyond either side of the gene

\*\*\*Extends 100kb beyond either side of the gene

\*\*\*\*Extends 50kb beyond either side of the gene

**Supp. Table S2A. Additional Genes Affected in the Extended FANCA Deletions**

| Family ID | $\Delta$ Start | $\Delta$ End | $\Delta$ Size | Centromeric Genes Affected by Deletion                                             |
|-----------|----------------|--------------|---------------|------------------------------------------------------------------------------------|
| 1         | 88,131,700     | 88,610,500   | 478,801       | <i>ZNF276, VSP9D1, SPATA2L, CDK10, C16orf55, CHMP1A, DPEP1, CPNE7, RPL13, SPG7</i> |
| 2         | 88,172,538     | 88,337,600   | 165,063       | <i>ZNF276, VSP9D1, SPATA2L, CDK10, C16orf55, CHMP1A, DPEP1, CPNE7</i>              |
| 3         | 88,184,848     | 88,336,349   | 151,502       | <i>ZNF276, VSP9D1, SPATA2L, CDK10, C16orf55, CHMP1A, DPEP1, CPNE7</i>              |
| 4         | 88,224,066     | 88,408,991   | 184,926       | <i>ZNF276, VSP9D1, SPATA2L, CDK10, C16orf55, CHMP1A, DPEP1</i>                     |
| 5         | 88,227,499     | 88,446,249   | 218,751       | <i>ZNF276, VSP9D1, SPATA2L, CDK10, C16orf55, CHMP1A, DPEP1</i>                     |
| 6         | 88,235,249     | 88,351,749   | 116,501       | <i>ZNF276, VSP9D1, SPATA2L, CDK10, C16orf55, CHMP1A</i>                            |
| 7         | 88,250,100     | 88,425,360   | 175,261       | <i>ZNF276, VSP9D1, SPATA2L, CDK10, C16orf55, CHMP1A</i>                            |
| 8         | 88,257,445     | 88,409,236   | 151,792       | <i>ZNF276, VSP9D1, SPATA2L, CDK10, C16orf55</i>                                    |
| 9         | 88,281,756     | 88,827,254   | 545,499       | <i>ZNF276, VSP9D1, SPATA2L, CDK10</i>                                              |
| 10        | 88,285,490     | 88,362,122   | 76,633        | <i>ZNF276, VSP9D1, SPATA2L, CDK10</i>                                              |
| 11        | 88,302,909     | 88,483,387   | 180,479       | <i>ZNF276, VSP9D1</i>                                                              |
| 12        | 88,311,999     | 88,394,999   | 83,001        | <i>ZNF276, VSP9D1</i>                                                              |
| 13        | 88,322,270     | 88,505,839   | 183,570       | <i>ZNF276</i>                                                                      |
| 14        | 88,327,695     | 88,377,962   | 50,268        | <i>ZNF276</i>                                                                      |
| 15        | 88,329,020     | 88,355,305   | 26,286        | <i>ZNF276</i>                                                                      |
| 16        | 88,330,849     | 88,500,000   | 169,152       | <i>ZNF276</i>                                                                      |
| 17        | 88,331,201     | 88,352,999   | 21,799        | <i>ZNF276</i>                                                                      |
| 18        | 88,331,357     | 88,351,875   | 20,519        | <i>ZNF276</i>                                                                      |
| 19        | 88,331,930     | 88,415,141   | 83,212        | <i>ZNF276</i>                                                                      |
| 20        | 88,334,499     | 88,393,249   | 58,751        | <i>ZNF276</i>                                                                      |

| Family ID | $\Delta$ Start | $\Delta$ End | $\Delta$ Size | Telomeric Genes Affected by Deletion |
|-----------|----------------|--------------|---------------|--------------------------------------|
| 88        | 88,409,549     | 88,411,749   | 2,201         | <i>none; FANCA-SPIRE2 intergenic</i> |
| 65        | 88,387,000     | 88,412,000   | 25,001        | <i>none; FANCA-SPIRE2 intergenic</i> |
| 72        | 88,399,249     | 88,412,249   | 13,001        | <i>none; FANCA-SPIRE2 intergenic</i> |
| 21        | 88,336,484     | 88,414,112   | 77,629        | <i>none; FANCA-SPIRE2 intergenic</i> |
| 23_d2     | 88,406,326     | 88,414,712   | 8,387         | <i>none; FANCA-SPIRE2 intergenic</i> |
| 19        | 88,331,930     | 88,415,141   | 83,212        | <i>none; FANCA-SPIRE2 intergenic</i> |
| 83        | 88,403,104     | 88,418,467   | 15,364        | <i>none; FANCA-SPIRE2 intergenic</i> |
| 82        | 88,403,094     | 88,418,774   | 15,681        | <i>none; FANCA-SPIRE2 intergenic</i> |
| 81        | 88,403,094     | 88,418,774   | 15,681        | <i>none; FANCA-SPIRE2 intergenic</i> |
| 74        | 88,400,101     | 88,419,559   | 19,459        | <i>none; FANCA-SPIRE2 intergenic</i> |
| 69        | 88,398,749     | 88,420,249   | 21,501        | <i>none; FANCA-SPIRE2 intergenic</i> |
| 7         | 88,250,100     | 88,425,360   | 175,261       | <i>SPIRE2</i>                        |
| 70        | 88,398,749     | 88,425,749   | 27,001        | <i>SPIRE2</i>                        |
| 66        | 88,387,749     | 88,432,749   | 45,001        | <i>SPIRE2</i>                        |
| 75        | 88,401,663     | 88,433,153   | 31,491        | <i>SPIRE2</i>                        |
| 76        | 88,401,663     | 88,433,153   | 31,491        | <i>SPIRE2</i>                        |

|       |            |            |         |                                                                                                        |
|-------|------------|------------|---------|--------------------------------------------------------------------------------------------------------|
| 77    | 88,401,663 | 88,433,153 | 31,491  | <i>SPIRE2</i>                                                                                          |
| 78    | 88,401,663 | 88,433,153 | 31,491  | <i>SPIRE2</i>                                                                                          |
| 79    | 88,401,663 | 88,433,153 | 31,491  | <i>SPIRE2</i>                                                                                          |
| 29    | 88,347,917 | 88,433,278 | 85,362  | <i>SPIRE2</i>                                                                                          |
| 80    | 88,402,939 | 88,435,730 | 32,792  | <i>SPIRE2</i>                                                                                          |
| 85    | 88,403,999 | 88,437,249 | 33,251  | <i>SPIRE2</i>                                                                                          |
| 62    | 88,383,499 | 88,437,499 | 54,001  | <i>SPIRE2</i>                                                                                          |
| 5     | 88,227,499 | 88,446,249 | 218,751 | <i>SPIRE2</i>                                                                                          |
| 28_d1 | 88,345,766 | 88,460,603 | 114,838 | <i>SPIRE2</i>                                                                                          |
| 22    | 88,338,249 | 88,470,249 | 132,001 | <i>SPIRE2, TCF25</i>                                                                                   |
| 61    | 88,383,499 | 88,474,299 | 90,801  | <i>SPIRE2, TCF25</i>                                                                                   |
| 11    | 88,302,909 | 88,483,387 | 180,479 | <i>SPIRE2, TCF25</i>                                                                                   |
| 16    | 88,330,849 | 88,500,000 | 169,152 | <i>SPIRE2, TCF25</i>                                                                                   |
| 13    | 88,322,270 | 88,505,839 | 183,570 | <i>SPIRE2, TCF25</i>                                                                                   |
| 1     | 88,131,700 | 88,610,500 | 478,801 | <i>SPIRE2, TCF25, MC1R, TUBB3, DEF8, CENPBD1, AFG3L1P, DBNDD1</i>                                      |
| 9     | 88,281,756 | 88,827,254 | 545,499 | <i>SPIRE2, TCF25, MC1R, TUBB3, DEF8, CENPBD1, AFG3L1P, DBNDD1, GAS81, C16ORF3, LOC100130015, PRMD7</i> |

**Supp. Table S2B. Description of the Neighboring Genes in the Extended FANCA Deletions**

| Location Relative to FANCA | Gene                | RefSeq_ID      | Location                | Gene Product                                          |
|----------------------------|---------------------|----------------|-------------------------|-------------------------------------------------------|
| Centromeric                | <i>SPG7</i>         | NM_003119.2    | chr16:88102306-88151675 | paraplegin isoform 1 precursor                        |
|                            | <i>RPL13</i>        | NM_001243131.1 | chr16:88154566-88160738 | 60S ribosomal protein L13 isoform 3                   |
|                            | <i>CPNE7</i>        | NM_153636.2    | chr16:88169677-88191155 | copine-7 isoform a                                    |
|                            | <i>DPEP1</i>        | NM_001128141.2 | chr16:88207217-88232340 | dipeptidase 1 precursor                               |
|                            | <i>CHMP1A</i>       | NM_002768.3    | chr16:88238340-88251630 | charged multivesicular body protein 1a isoform 2      |
|                            | <i>C16orf55</i>     | NM_153025.1    | chr16:88251711-88265176 | uncharacterized protein C16orf55                      |
|                            | <i>CDK10</i>        | NM_001160367.1 | chr16:88280577-88290273 | cyclin-dependent kinase 10 isoform d                  |
|                            | <i>SPATA2L</i>      | NM_152339.3    | chr16:88290266-88295622 | spermatogenesis-associated protein 2-like protein     |
|                            | <i>VSP9D1</i>       | NM_004913.2    | chr16:88301042-88314895 | Unknown protein                                       |
|                            | <i>ZNF276</i>       | NM_001113525.1 | chr16:88315453-88334833 | zinc finger protein 276 isoform a                     |
| Telomeric                  | <i>SPIRE2</i>       | NM_032451.1    | chr16:88422408-88465228 | protein spire homolog 2                               |
|                            | <i>TCF25</i>        | NM_014972.2    | chr16:88467495-88505293 | transcription factor 25                               |
|                            | <i>MC1R</i>         | NM_002386.3    | chr16:88511788-88514886 | melanocyte-stimulating hormone receptor               |
|                            | <i>TUBB3</i>        | NM_006086      | chr16:88517188-88530006 | PubMed on Product: tubulin beta-3 chain isoform 1     |
|                            | <i>DEF8</i>         | NM_001242819.1 | chr16:88543329-88561969 | differentially expressed in FDCP 8 homolog isoform 6  |
|                            | <i>CENPBD1</i>      | NM_145039.3    | chr16:88563684-88566741 | CENPB DNA-binding domains containing 1                |
|                            | <i>AFG3L1P</i>      | NR_003226.1    | chr16:88566489-88590529 | pseudogene AFG3 ATPase family gene 3-like 1 (AFG3L1P) |
|                            | <i>DBNDD1</i>       | NM_001042610.1 | chr16:88598780-88613438 | dysbindin domain containing 1 (DBNDD1)                |
|                            | <i>GAS8</i>         | NM_001481.2    | chr16:88616509-88638880 | Homo sapiens growth arrest-specific 8 (GAS8),         |
|                            | <i>C16orf3</i>      | NM_001214.3    | chr16:88622817-88623810 | Homo sapiens chromosome 16 open reading frame 3       |
|                            | <i>LOC100130015</i> | NR_027335.2    | chr16:88633670-88641534 | Homo sapiens 5-hydroxyisourate hydrolase pseudogene   |
|                            | <i>PRDM7</i>        | NM_001098173.1 | chr16:88650475-88669839 | Homo sapiens PR domain containing 7 (PRDM7)           |

The genomic coordinates are according to the NCBI36/hg18 build.

**Supp. Table S3. Primer Sequences Used for Cloning and Sequencing Deletion Breakpoints**

| FAM ID | Sense Primer                   | Antisense Primer              | Size (bp) | FA Gene |
|--------|--------------------------------|-------------------------------|-----------|---------|
| 2      | CATATCAGCACCTAAAAGTCTCCTGGT    | CATCCTGAGTTCCCAGAACCGTC       | 2894      | FANCA   |
| 4      | GTAGCTGGAGTGTGGGTCCTGTGA       | GAGATCACGCCCTTGCAATC          | 735       | FANCA   |
| 7      | GCGGGAGGTAGATGTTATCTTTCATC     | CCTTCACATGGGCCGTAACCA         | 881       | FANCA   |
| 8      | TCTCGGGTCTCAACTACTGTAGCC       | AAGGCCATGTCCGACTCGTG          | 2344      | FANCA   |
| 10     | TCGCCCAATTCTCCCTGAGGT          | GGGCCATCCTCTCTTAGAAACACAG     | 889       | FANCA   |
| 11     | CGCACAGACACAGATGATCCGC         | TCCCGAAGAAACCCATCAACAC        | 1193      | FANCA   |
| 13     | CTTCAAAAACCATCAGTGACCTTTCTG    | TGGGGCTTCGCCTTCAATTCTGG       | 1188      | FANCA   |
| 14     | CAAGTGCCTTACCAGGGCTGCACG       | GTGAGTGCGTGTGTGCCAGTCAAGG     | 532       | FANCA   |
| 15     | GACGCACACTGGAAGCTGCTGCAT       | CACGCGGTGGCAATTTCTGTTT        | 2375      | FANCA   |
| 17     | TAGAGAACAGCCATAGCTGTGACAATCAGT | ATATGGAGTATCCTGGTGGGTATATGGG  | 1573      | FANCA   |
| 18     | TAGAGAACAGCCATAGCTGTGACAATCAGT | CCATCACACACCGATGAGGCCTT       | 505       | FANCA   |
| 19     | TGGGGCTGGTCTTGAAGTACTTC        | TTGTAAGATGAGAGAACTAGGCTGGACGT | 1902      | FANCA   |
| 21     | TGTAAGTTGTGTGCTGACATGGCA       | TGCCAGATCAAAGGACAGATGAACT     | 2021      | FANCA   |
| 23_d1  | GCTGTGGATTCAAGTTTTGAGAAAA      | GGTTCGTCATGTTTTCTCTGAATCAC    | 1375      | FANCA   |
| 24     | CTGCGGAAAATCTCAAAGAGGAAGTGC    | AACTCCCCGGGCAGTGTGTT          | 779       | FANCA   |
| 25     | CCTTGAGCCCAGGAGTTACAGTACTAC    | ACTTAGCTGGTCATGGTGAT          | 1803      | FANCA   |
| 26     | TTATCAATTAAGAAAAACAGCTGGGCG    | CACGTTTAGCCTTGGGTATATTAGTATGG | 732       | FANCA   |
| 27     | CCTTGAGCCCAGGAGTTACAGTACTAC    | GCGCCTGGCCTAATATTTTGG         | 2616      | FANCA   |
| 28_d1  | TCGAGCTCAGCTGATTCTCCTAAGTC     | TGATGGGTCACATACTTTTGAAAGTT    | 1366      | FANCA   |
| 29     | TCAACTGCACTGGGGACAGACA         | GGCTGCCCTGCCTTACTCTCTTA       | 942       | FANCA   |
| 30     | ACTCAACTGCACTGGGGACAGA         | GTATAGAGGGGAATAAACAAGCCTGCC   | 1710      | FANCA   |
| 31     | GCAGTGAGCAGCTCTGTGCAAACC       | GCTGCCTTTCCTTGTGTTCTCTGAG     | 2006      | FANCA   |
| 32     | TCAAGGCTGGCATCACTCCTCA         | AGCCTTCCGGTGATTCAATGATG       | 1601      | FANCA   |
| 33     | CTCCAGGTGTAACCAGTCTTGTAAGT     | TTCTAGATCCCCTTCCACCTGCA       | 1190      | FANCA   |
| 34     | GAAAGTTCCTCTTACTAATTTGCTAAGGA  | CTGAGAAAGAGAGCAAGCAATTCAATAC  | 1310      | FANCA   |
| 35     | CTGAGAAAGAGAGCAAGCAATTCAATAC   | TCCCCTGTCGTGCTGGTATTTTG       | 1784      | FANCA   |
| 36     | CCAAAACAACCAGGCAAACATCCTC      | GGTTCGTCATGTTTTCTCTGAATCAC    | 624       | FANCA   |
| 37     | CCAAAACAACCAGGCAAACATCCTC      | GGTTCGTCATGTTTTCTCTGAATCAC    | 624       | FANCA   |
| 38     | CCAAAACAACCAGGCAAACATCCTC      | GGTTCGTCATGTTTTCTCTGAATCAC    | 624       | FANCA   |
| 39     | TAACCAGGCACACATGGGTGAG         | AGCCTTCCGGTGATTCAATGATG       | 1241      | FANCA   |
| 40     | TAACCAGGCACACATGGGTGAG         | TCCTGTGGGGTTGAATGGAGAGG       | 747       | FANCA   |
| 44     | TTGCCTCCATGCGGAGCTTG           | ATTCTACCAGCATTTGTTA           | 838       | FANCA   |
| 45     | GCGCACTGGTCTGAGTGAAGAC         | GAGTTCGTTTGCATTCTCACCAGC      | 923       | FANCA   |
| 46_d1  | TCTCCTTAGTTTAGTGAAGCCCC        | CACCTGGCACAAGCCTATAGTTTTG     | 1046      | FANCA   |
| 47_d1  | GGAGGACACCTCTCAAGAGAAGCA       | TATAAGAGTTCGTTTGCATTCTCACCAGC | 1893      | FANCA   |
| 48     | ATCTGACTGCTAATGGAGTTTCATGCCA   | GGGAGCATTTTACCTGTTAATTATGGTT  | 907       | FANCA   |
| 49     | GGAGGACACCTCTCAAGAGAAGCA       | ATGGCCGCCTAATGAAAACA          | 442       | FANCA   |
| 50     | AGAGGTCATGCTCTCAGGGTGGGTC      | TCCCCTGTCGTGCTGGTATTTTG       | 941       | FANCA   |
| 51     | AGAGGTCATGCTCTCAGGGTGGGTC      | TCCCCTGTCGTGCTGGTATTTTG       | 941       | FANCA   |
| 52     | TGAAGAATGATGCAGCCGGGTGC        | GTTCTACTCTACCTCCACAAGAGCCACT  | 777       | FANCA   |
| 53     | TCATCATGCTACCCTACTGCAGCC       | GGGAAGCAGCCTTCTATTGTGTTTT     | 1142      | FANCA   |
| 54     | TCATCATGCTACCCTACTGCAGCC       | CCAGAGTGTGGAAGTGTGGGATT       | 1214      | FANCA   |

|       |                                |                               |      |       |
|-------|--------------------------------|-------------------------------|------|-------|
| 55    | ACCATCTGACATTTGGCTGCTATAAA     | GATTGCACATCCCTGGTTCCCC        | 451  | FANCA |
| 56    | ACCATCTGACATTTGGCTGCTATAAA     | GGGAAGCAGCCTTCTATTGTGTTTT     | 369  | FANCA |
| 57    | ACCATCTGACATTTGGCTGCTATAAA     | GCACCTTAACCCCCGAAGTACTGG      | 567  | FANCA |
| 46_d2 | GGAGGACACCTCTCAAGAGAAGCA       | CACGTTTAGCCTTGGGTATATTAGTATGG | 528  | FANCA |
| 63_d2 | TCTCCTCTTAGTTTAGTGGAAGCCCC     | CACCTGGCACAAAGCCTATAGTTTTG    | 1046 | FANCA |
| 58    | TCTCCTCTTAGTTTAGTGGAAGCCCC     | CACCTGGCACAAAGCCTATAGTTTTG    | 1046 | FANCA |
| 59    | TCTCCTCTTAGTTTAGTGGAAGCCCC     | CACCTGGCACAAAGCCTATAGTTTTG    | 1046 | FANCA |
| 60    | AGAGGTCATGCTCTCAGGGTGGGTC      | AGAGGCCAGAGTGTCCACTGCTGCT     | 1653 | FANCA |
| 47_d2 | TTTCAGGACTTACGTGAAAATTAGAGACG  | CCTTTCCTTTGGCTGTAAGCCCAG      | 1568 | FANCA |
| 28_d2 | TCTCGTGAGGCTTACAACCTGCA        | GAGCCAGTACATTACAATAACAGTTTCG  | 735  | FANCA |
| 67    | AAGAAACGGCACTTCAGGAGGC         | CGGGTTTGATTCTGGCTTTGAC        | 646  | FANCA |
| 68    | AACATACACACAGACCAACGGAACAGG    | CGTTTAGCCTTGGGTATATTAGTATGGAG | 467  | FANCA |
| 71    | TCCTCAGGAAGGCCAGGCATAGT        | GAGCCAGTACATTACAATAACAGTTTCG  | 857  | FANCA |
| 73    | TTCCCAATTCCCTTCTGTTGTTTATTCT   | ATGCCCTTTTGCTTGAGGTAAGAGGA    | 967  | FANCA |
| 74    | CCCAATTCCCTTCTGTTGTTTATTCT     | CGAATTGTGCCTAAAGTTTGTTTGTTG   | 1507 | FANCA |
| 75    | CCAAGGCAGAAGAATTTCTCTTAGTACAG  | TGTGAGTGAAGCCATCTCTGATCTCT    | 1468 | FANCA |
| 76    | CAGAACAAAATGAAAAGTCTCCCGTG     | TTGACTCTCTTAGCCTTGGGGTCAG     | 1627 | FANCA |
| 77    | AAATTCTGCTCTAGGCCGAGGC         | GGCTGCCCTGCCTTTGACTCTCTTA     | 1151 | FANCA |
| 78    | CCAAGGCAGAAGAATTTCTCTTAGTACAG  | TGTGAGTGAAGCCATCTCTGATCTCT    | 1469 | FANCA |
| 79    | AAATTCTGCTCTAGGCCGAGGC         | GGCTGCCCTGCCTTTGACTCTCTTA     | 1151 | FANCA |
| 80    | CACTGTGAACACTGTGCCTGTCA        | GCCCAGGATGTTATAAAACTCAGATGT   | 460  | FANCA |
| 81    | GCACTGTAGCCTACTTCTAACCCTTTCT   | TCTTCCTCAAAGGGCCTCACGT        | 843  | FANCA |
| 82    | GCACTGTAGCCTACTTCTAACCCTTTCT   | TCTTCCTCAAAGGGCCTCACGT        | 843  | FANCA |
| 83    | GCACTGTAGCCTACTTCTAACCCTTTCT   | TCTTCCTCAAAGGGCCTCACGT        | 1159 | FANCA |
| 87    | CCCAGAGTTATACATTGGTATTTGTTACGT | ATGCCCTTTTGCTTGAGGTAAGAGGA    | 2002 | FANCA |
| 23_d2 | CCCAGAGTTATACATTGGTATTTGTTACGT | TGCCAGATCAAAGGACAGATGAACTT    | 1413 | FANCA |
| 90    | ATCTGACTGCTAATGGAGTTTCATGCCA   | GGGAGCATTTTACCTGTTAATTATGGTT  | 907  | FANCC |
| 91    | ATCTGACTGCTAATGGAGTTTCATGCCA   | GGGAGCATTTTACCTGTTAATTATGGTT  | 907  | FANCC |
| 92    | ATCTGACTGCTAATGGAGTTTCATGCCA   | GGGAGCATTTTACCTGTTAATTATGGTT  | 907  | FANCC |
| 93    | ATCTGACTGCTAATGGAGTTTCATGCCA   | GGGAGCATTTTACCTGTTAATTATGGTT  | 907  | FANCC |
| 94    | CTGTGCAGCCTCAGCTCCTCAGAA       | ACTGAACCGCCAGGACCCTTGATT      | 515  | FANCC |
| 95    | GTATGTGGAAGCTGGCGATGGA         | ACCAGGGTCCTCCTTCTTCTTT        | 680  | FANCC |

**Supp. Table S4. Overlap or Insertion Sequences at Deletion Breakpoints in FA Families**

| FAM ID | Overlap or Insertion Sequences*                                                                                                                                                                       |
|--------|-------------------------------------------------------------------------------------------------------------------------------------------------------------------------------------------------------|
| 2      | GGCATGGTGGC                                                                                                                                                                                           |
| 4      | CAG                                                                                                                                                                                                   |
| 7      | AGTCTCGCTCTGTCGCCCAGGCTGGAGTG                                                                                                                                                                         |
| 8      | GCTAGGATTACAGGCGTGAGCCACCA                                                                                                                                                                            |
| 10     | AG                                                                                                                                                                                                    |
| 11     | CCAG                                                                                                                                                                                                  |
| 13     | GCCTCAGCCTCCCGAGTAGCTGGG                                                                                                                                                                              |
| 14     | GC                                                                                                                                                                                                    |
| 15     | TCCAGCCTGGG                                                                                                                                                                                           |
| 17     | GAGG; a SNP near overlap                                                                                                                                                                              |
| 18     | GG                                                                                                                                                                                                    |
| 19     | AG                                                                                                                                                                                                    |
| 21     | GTGGCTCACGCCTGTAATCCCAGCACTTTGGGAGGC                                                                                                                                                                  |
| 23_d1  | ACTTTGGGAGGCCAAGGCCGG                                                                                                                                                                                 |
| 24     | CCAGCACTTTGGGAGGCCGAGGCAGGCAGAT                                                                                                                                                                       |
| 25     | GAGACCA                                                                                                                                                                                               |
| 26     | TGCAGTGAGCCAAGATC                                                                                                                                                                                     |
| 27     | CCTGTAATCC                                                                                                                                                                                            |
| 28_d1  | CCAGGCTGGAGTGCAAGTGGCACAATCTCGGCTCACTGCAAGCTCC                                                                                                                                                        |
| 29     | AAAAAAAAAAAA                                                                                                                                                                                          |
| 30     | <i>ins. ttccagcttcccagcctttatggtaggtttgcact</i>                                                                                                                                                       |
| 31     | <i>ins. tggagcctgaCCCAGCCTgaccagcctg</i>                                                                                                                                                              |
| 32     | AC                                                                                                                                                                                                    |
| 33     | GCTAACACGGTGAAACCTGT                                                                                                                                                                                  |
| 34     | GAGGTCAGGAGATTGAGACCATCCTGGCTAACACAGTGAAACCC                                                                                                                                                          |
| 35     | <i>ins.cacacaaaattagcctgacgtggtggcgggtgctgtagtcccagctactcgggaggctgaggcaggagaatggcatgaacccggaaggcggagcttg<br/>cagtgagctgagactgcgccactgcactccagcctgggcaatagaacgagactccattccccaaaaaaaaaaaaaaaaaacaag</i> |
| 36     | AAAA                                                                                                                                                                                                  |
| 37     | AAAA                                                                                                                                                                                                  |
| 38     | AAAA                                                                                                                                                                                                  |
| 39     | CGCCTGTAGTCCCAGCTACT                                                                                                                                                                                  |
| 40     | GAGGCCAAGGCG                                                                                                                                                                                          |
| 44     | GCTTGAACCC                                                                                                                                                                                            |
| 45     | GCTTGAACCC                                                                                                                                                                                            |
| 46_d1  | CTGGCTAACACGGTGAAACCCCGTCTCT                                                                                                                                                                          |
| 47_d1  | GTCTCTACTAAAAA                                                                                                                                                                                        |
| 48     | CGCCTGTA                                                                                                                                                                                              |
| 49     | GGGAGGCGGAGCTT                                                                                                                                                                                        |
| 50     | AC                                                                                                                                                                                                    |



51 AC  
 52 none  
 53 CCTGTAATCCCAG  
 54 GAGGCTGAGGCAGGAGAATGGT  
 55 TAATCCCAGCACTTTGGGAGGC  
 56 GTCTCTACTAAAAA  
 57 ATTAGCCAGG  
 46\_d2 *ins. tt*  
 63\_d2 *ins. tt*  
 58 *ins. tt*  
 59 *ins. tt*  
 60 *ins. tt*  
 47\_d2 CTGAGGCAGGAGAATAGCTTGAA  
 28\_d2 TGGGAGGC  
 67 GTGGCGGACGCC  
 68 TAGTCCCAGCTACTCGGGAG  
 71 A  
 73 CTCAC  
 74 GCCTCCCAAAGTGCTGGGATTACAGG  
 75 GGCCTGGTGGCGG  
 76 GGCCTGGTGGCGG  
 77 GGCCTGGTGGCGG  
 78 GGCCTGGTGGCGG  
 79 GGCCTGGTGGCGG  
 80 TGCCTCAGCCTCC  
 81 GGCCTCCCAAAGTGCTGGGATTACAGG  
 82 GGCCTCCCAAAGTGCTGGGATTACAGG  
 83 CCTGCCTCGGCCTCCCAAAGTGCTGGGATTACAGGTGTGAGCCAC  
 87 GTGAAACCCTGTCTCTACTAAA  
 23\_d2 CCTGTAATCCCAGCACTTTGGGAGCCGAGG  
 90 *ins. aaaaagtaaatttagtta*  
 91 *ins. aaaaagtaaatttagtta*  
 92 *ins. aaaaagtaaatttagtta*  
 93 *ins. aaaaagtaaatttagtta*  
 94 *ins. aaaaagtaaatttagtta*  
 95 *ins. c*

---

Details of the characteristics of the breakpoints are provided in Table 3.

\*Overlap sequence is capitalized and insertion sequence is in lower case and begins prefix "*ins.*"

Identical deletions are shaded in gray.

**Supp. Table S5. Families With Conserved Deletions in FANCA and FANCC and Their Ancestry**

| <b>Gene</b> | <b>Common Deletions (CD)</b>  | <b>Exons</b> | <b>Family ID</b> | <b>Ancestry</b>                     |
|-------------|-------------------------------|--------------|------------------|-------------------------------------|
| FANCA       | (CD1) chr16:88357692-88376135 | exons 18-28  | 36               | European/Caucasian                  |
|             |                               |              | 37               | European/Caucasian                  |
|             |                               |              | 38               | European/Caucasian                  |
| FANCA       | (CD2) chr16:88366653-88394866 | exons 9-22   | 44               | European/Caucasian                  |
|             |                               |              | 45               | European/Caucasian                  |
| FANCA       | (CD3) chr16:88368840-88373628 | exons 18-21  | 50               | European/Caucasian                  |
|             |                               |              | 51               | French, Hispanic/Caucasian          |
| FANCA       | (CD4) chr:88383475-88391064   | exons 11-14  | 46_d2            | European-American Indian/ Caucasian |
|             |                               |              | 58               | European/Caucasian                  |
|             |                               |              | 59               | European/Caucasian                  |
|             |                               |              | 60               | European/Caucasian                  |
|             |                               |              | 63_d2            | African-American                    |
| FANCA       | (CD5) chr16:88401663-88433153 | exons 1-6    | 75               | European/Caucasian                  |
|             |                               |              | 76               | European/Caucasian                  |
|             |                               |              | 77               | European/Caucasian                  |
|             |                               |              | 78               | European/Caucasian                  |
|             |                               |              | 79               | European/Caucasian                  |
| FANCA       | (CD6) chr16:88403094-88418774 | exons 1-5    | 81               | European/Caucasian                  |
|             |                               |              | 82               | Hispanic                            |
|             |                               |              | 83*              | European/Caucasian                  |
| FANCC       | chr9:97046452-97050240        | exon 3       | 90               | European/Caucasian                  |
|             |                               |              | 91               | European/Caucasian                  |
|             |                               |              | 92               | European/Caucasian                  |
|             |                               |              | 93               | European/Caucasian                  |
|             |                               |              | 94               | European/Caucasian                  |

\*deletion chr16:88403104-88418467

The genomic coordinates are according to the NCBI36/hg18 build.

**Supp. Table S6. *Alu* Elements in *FANCA* with Multiple Breakpoints (BP)**

| <b>SINE Element</b> | <b>Start</b> | <b>End</b> | <b>Intron</b> | <b>Unique BP</b> | <b>CDBP</b> |
|---------------------|--------------|------------|---------------|------------------|-------------|
| <i>AluSx</i>        | 88,347,682   | 88,347,981 | 30            | 2                | -           |
| <i>AluY</i>         | 88,355,047   | 88,355,357 | 29            | 2                | -           |
| <i>AluY</i>         | 88,356,875   | 88,357,188 | 28            | 3                | -           |
| <i>AluSg</i>        | 88,357,566   | 88,357,859 | 28            | 2                | CD1_CBP     |
| <i>AluY</i>         | 88,368,358   | 88,368,663 | 21            | 5                | -           |
| <i>AluY</i>         | 88,375,302   | 88,375,614 | 17            | 4                | -           |
| <i>AluY</i>         | 88,376,003   | 88,376,138 | 17            | 2                | CD1_TBP     |
| <i>AluY</i>         | 88,376,139   | 88,376,434 | 17            | 2                | -           |
| <i>AluY</i>         | 88,377,178   | 88,377,485 | 15            | 3                | -           |
| <i>AluY</i>         | 88,393,654   | 88,393,920 | 8             | 2                | -           |
| <i>AluSx</i>        | 88,394,658   | 88,394,971 | 8             | 3                | CD2_TBP     |
| <i>AluSq</i>        | 88,399,826   | 88,400,121 | 6             | 2                | -           |
| <i>AluY</i>         | 88,401,513   | 88,401,817 | 6             | 2                | CD5_CBP     |
| <i>AluY</i>         | 88,402,820   | 88,403,114 | 5             | 4                | CD6_CBP     |
| <i>AluY</i>         | 88,403,951   | 88,404,249 | 5             | 2                | -           |
| <i>AluY</i>         | 88,405,963   | 88,406,268 | 3             | 2                | -           |
| <i>AluSp</i>        | 88,406,274   | 88,406,579 | 3             | 2                | -           |
| <i>AluSx</i>        | 88,408,947   | 88,409,245 | 2             | 3                | -           |
| <i>AluSg</i>        | 88,418,482   | 88,418,795 | downstream    | 2                | CD6_TBP     |
| <i>AluY</i>         | 88,432,969   | 88,433,298 | downstream    | 2                | CD5_TBP     |

CDBP = Conserved Deletion Breakpoint

CBP = Centromeric Breakpoint

TBP = Telomeric Breakpoint

The chr 16 genomic coordinates are according to the NCBI36/hg18 build.
